# Supplementary material for: Characterization of the prohormone complement in Amphiprion and related fish species integrating genome and transcriptome assemblies
Source: PLoS One. 2020 Mar 12;15(3):e0228562. doi: 10.1371/journal.pone.0228562 (PMC7067429; doi:10.1371/journal.pone.0228562)
Supplement: S1 Table — (XLSX) [file pone.0228562.s004.xlsx]

## Sheet: S2Table
ph	Name	Duplicated	isoform	Family	No Gaps	One consequentive gap	Two consequentive gaps	Three consequentive gaps	Four consequentive gaps	Five consequentive gaps	Six or more consequentive gaps	Missed Isoforms
ADCYAP1A_v1	adenylate cyclase activating polypeptide 1A isoform 1	y	v1	Glucagon	26	0	3	0	0	0	0	0
ADCYAP1A_v2	adenylate cyclase activating polypeptide 1A isoform 2		v2	Glucagon	27	0	2	0	0	0	0	0
ADCYAP1B_v1	adenylate cyclase activating polypeptide 1B isoform 1	y	v1	Glucagon	1	0	27	0	0	0	0	1
ADCYAP1B_v2	adenylate cyclase activating polypeptide 1B isoform 2		v2	Glucagon	1	0	27	0	0	0	1	0
ADM1A	adrenomedullin 1A	y		calcitonin	0	26	0	0	1	0	1	1
ADM1B	adrenomedullin 1B	y		calcitonin	0	0	0	0	3	21	3	2
ADM2A	adrenomedullin 2A	y		calcitonin	0	19	3	0	0	3	3	1
ADM2B	adrenomedullin 2B	y		calcitonin	20	0	5	0	1	0	2	1
ADM5	Adrenomedullin 5			calcitonin	1	24	1	0	0	0	2	1
AGRP	agouti related neuropeptide			Agouti	0	5	0	0	20	0	3	1
APLN	apelin			apelin	26	0	1	0	0	0	0	2
AUGN1	augurin 1	y		augurin	0	1	1	16	0	0	10	1
AUGN2	augurin 2	y		augurin	2	0	0	0	0	0	15	12
AVP	arginine vasopressin			vasopressin oxytocin	26	2	0	0	0	0	1	0
CALCA_v1	calcitonin related polypeptide alpha isoform 1	y	v1	calcitonin	24	1	0	0	0	0	4	0
CALCA_v2	calcitonin related polypeptide alpha isoform 2		v2	calcitonin	1	25	0	0	0	0	3	0
CALCB_v1	calcitonin related polypeptide beta isoform 1	y	v1	calcitonin	0	0	0	1	0	0	26	2
CALCB_v2	calcitonin related polypeptide beta isoform 2		v2	calcitonin	0	0	0	1	0	0	27	1
CARTPT1A	CART prepropeptide 1A	y		CARTPT	25	0	0	0	0	0	2	2
CARTPT1B	CART prepropeptide 1B	y		CARTPT	1	27	0	0	0	0	0	1
CARTPT2A	CART prepropeptide 2A	y		CARTPT	26	1	0	0	0	0	2	0
CARTPT2B	CART prepropeptide 1B	y		CARTPT	1	27	0	0	0	0	0	1
CARTPT3A	CART prepropeptide 3A	y		CARTPT	14	0	0	0	0	0	15	0
CARTPT3B	CART prepropeptide 3B	y		CARTPT	0	19	3	4	0	0	2	1
CARTPT4	CART prepropeptide 4	y		CARTPT	22	2	0	0	0	1	2	2
CARTPT5	CART prepropeptide 5	y		CARTPT	0	0	0	0	1	2	21	5
CARTPT8	CART prepropeptide 8	y		CARTPT	1	0	0	0	0	0	0	28
CCK1	Cholecystokinin 1	y		gastrin cholecystokinin	0	1	1	23	0	0	4	0
CCK2	Cholecystokinin 2	y		gastrin cholecystokinin	26	1	1	1	0	0	0	0
CHGA	chromogranin A			granin	0	0	0	0	0	0	29	0
CHGB_v1	chromogranin B isoform 1		v1	granin	0	0	0	0	0	0	27	2
CHGB_v2	chromogranin B isoform 2		v2	granin	0	0	0	0	0	0	13	16
CRH1A	corticotropin releasing hormone 1	y		Corticotrophin	1	2	0	23	2	0	1	0
CRH1B	corticotropin releasing hormone 2	y		Corticotrophin	0	0	0	0	0	1	22	6
CST3A	cystatin C A	y		cystatin	0	0	1	1	24	0	2	1
CST3B	cystatin C B	y		cystatin	0	0	0	1	0	1	25	2
EDN1A	endothelin 1A	y		endothelin sarafotoxin	0	0	0	0	0	0	28	1
EDN1B	endothelin 1B	y		endothelin sarafotoxin	5	14	1	1	0	0	7	1
EDN2A	endothelin 2A	y		endothelin sarafotoxin	0	0	1	0	0	0	27	1
EDN2B	endothelin 2B	y		endothelin sarafotoxin	0	0	0	23	0	0	5	1
EDN3A	endothelin 3A	y		endothelin sarafotoxin	0	0	0	0	1	0	26	2
EDN3B	endothelin 3B	y		endothelin sarafotoxin	0	1	0	17	0	1	7	3
GAL_v1	galanin and GMAP prepropeptide isoform 1		v1	galanin	1	0	0	27	0	0	1	0
GAL_v2	galanin and GMAP prepropeptide isoform 2		v2	galanin	1	0	0	0	21	1	5	1
GAST	gastrin			gastrin cholecystokinin	0	0	0	0	21	0	7	1
GCG1A	glucagon 1A	y		Glucagon	23	4	0	1	0	0	0	1
GCG1B	glucagon 1B	y		Glucagon	0	0	1	1	0	0	24	3
GCG2	glucagon 2	y		Glucagon	0	26	0	1	0	0	1	1
GHRH	growth hormone releasing hormone			Glucagon	0	0	0	0	0	0	25	4
GHRL	ghrelin and obestatin prepropeptide			motilin(CHK ME)	0	0	1	0	1	0	23	4
GIP	gastric inhibitory polypeptide			Glucagon	0	26	0	1	0	0	1	1
GNRH1	gonadotropin releasing hormone 1			gnrh	25	1	1	0	0	0	1	1
GNRH2	gonadotropin releasing hormone 2			gnrh	1	28	0	0	0	0	0	0
GNRH3	gonadotropin releasing hormone 3			gnrh	0	0	18	2	0	1	7	1
GRP	gastrin releasing peptide			bombesin neuromedin b ranatensin	0	1	25	1	0	0	2	0
HAMP1	hepcidin antimicrobial peptide 1	y		hepcidin	0	0	0	0	0	19	3	7
HAMP2	hepcidin antimicrobial peptide 2	y		hepcidin	0	0	0	1	0	15	5	8
HAMP3A	hepcidin antimicrobial peptide 3A	y		hepcidin	0	1	0	1	0	0	15	12
HAMP3B	hepcidin antimicrobial peptide 3B	y		hepcidin	0	0	0	0	3	0	0	26
HAMP3C	hepcidin antimicrobial peptide 3C	y		hepcidin	0	0	1	0	1	1	0	26
HAMP4A	hepcidin antimicrobial peptide 4A	y		hepcidin	17	0	0	0	0	1	1	10
HAMP4B	hepcidin antimicrobial peptide 4B	y		hepcidin	1	0	1	0	0	0	26	1
HCRT	hypocretin neuropeptide precursor			orexin	1	0	26	0	0	0	1	1
IAPP	islet amyloid polypeptide			calcitonin	0	0	26	1	0	0	2	0
IGF1	insulin like growth factor 1			Insulin	26	1	1	0	0	0	1	0
IGF2	insulin like growth factor 2			Insulin	0	0	2	16	0	1	8	2
IGF3	insulin like growth factor 3			Insulin	0	1	20	2	0	0	3	3
INS1A	insulin 1A	y		Insulin	0	1	18	0	0	1	4	5
INS1B	insulin 1B	y		Insulin	24	0	0	0	0	0	4	1
INS2	Insulin 2	y		Insulin	1	4	2	1	0	0	14	7
INSL3	insulin like 3			Relaxin	0	0	1	1	0	21	4	2
INSL5A	insulin like 5A	y		Relaxin	1	0	2	1	0	0	0	25
INSL5B	insulin like 5A	y		Relaxin	1	1	0	19	2	0	5	1
KISS2	KiSS-1 metastasis suppressor			kisspeptin	0	0	24	0	0	0	4	1
MLN	motilin			motilin	28	0	0	1	0	0	0	0
NMB1	neuromedin B1	y		bombesin neuromedin b ranatensin	0	0	0	1	0	0	27	1
NMB2	neuromedin B2	y		bombesin neuromedin b ranatensin	1	22	0	0	0	1	3	2
NMS	neuromedin S			nmu	0	0	0	0	1	18	7	3
NMU_v1	neuromedin U isoform 1		v1	nmu	0	0	0	2	0	3	16	8
NMU_v2	neuromedin U isoform 2		v2	nmu	0	0	0	0	1	20	4	4
NMU_v3	neuromedin U isoform 3		v3	nmu	0	3	0	0	0	16	4	6
NMU_v5	neuromedin U isoform 4		v5	nmu	0	0	0	0	4	15	3	7
NMU_v6	neuromedin U isoform 5		v6	nmu	27	1	0	0	0	0	1	0
NPB1	neuropeptide B1	y		neuropeptide B/W	26	1	0	0	0	0	1	1
NPB2	neuropeptide B2	y		neuropeptide B/W	26	1	0	0	0	0	1	1
NPFF	neuropeptide FF-amide peptide precursor			farp fmrfamide related peptide	0	0	0	0	16	0	12	1
NPPA	natriuretic peptide A			Natriuretic peptide	1	2	19	1	0	0	3	3
NPPB	natriuretic peptide B			Natriuretic peptide	0	5	22	0	1	0	1	0
NPPC1	natriuretic peptide C1	y		Natriuretic peptide	0	0	0	1	0	1	26	1
NPPC2	natriuretic peptide C2	y		Natriuretic peptide	0	4	0	0	0	0	24	1
NPPC3	natriuretic peptide C3	y		Natriuretic peptide	28	0	0	0	0	0	0	1
NPPC4	natriuretic peptide C4	y		Natriuretic peptide	0	0	0	0	1	16	9	3
NPVF	neuropeptide VF precursor			farp fmrfamide related peptide	29	0	0	0	0	0	0	0
NPY1	neuropeptide Y2	y		NPY	24	1	0	0	0	0	3	1
NPY2	neuropeptide Y1	y		NPY	0	1	26	0	0	0	2	0
NTS	neurotensin			neurotensin	1	7	20	0	0	0	1	0
NUCB1	nucleobindin 1	y		nucleobindin	0	0	1	0	0	0	28	0
NUCB2A	nucleobindin 2A	y		nucleobindin	0	0	0	0	0	25	4	0
NUCB2B	nucleobindin 2B	y		nucleobindin	0	0	0	0	0	0	28	1
OSTN	osteocrin			Osteocrin	25	2	0	0	0	0	2	0
OXT	oxytocin/neurophysin I prepropeptide			vasopressin oxytocin	0	0	1	5	0	1	22	0
PCSK1N	proprotein convertase subtilisin/kexin type 1 inhibitor			granin	0	1	0	27	0	0	1	0
PDGFA1	platelet derived growth factor subunit A1	y		Pdgf/vegf growth factor	0	0	28	0	0	0	1	0
PDGFA2	platelet derived growth factor subunit A2	y		Pdgf/vegf growth factor	0	0	0	1	1	2	21	4
PDGFB1_v1	platelet derived growth factor subunit B1 isoform 1	y	v1	Pdgf/vegf growth factor	0	0	0	1	0	2	26	0
PDGFB1_v2	platelet derived growth factor subunit B1 isoform 2		v2	Pdgf/vegf growth factor	0	0	0	0	23	0	4	2
PDGFB2	platelet derived growth factor subunit B2	y		Pdgf/vegf growth factor	25	1	1	0	0	0	1	1
PDGFC	platelet derived growth factor C			Pdgf/vegf growth factor	0	22	0	0	0	0	1	6
PDGFD_v1	platelet derived growth factor D isoform 1		v1	Pdgf/vegf growth factor	0	23	1	0	0	0	3	2
PDGFD_v2	platelet derived growth factor D isoform 2		v2	Pdgf/vegf growth factor	0	0	0	0	1	1	27	0
PDYN	prodynorphin			Opioid	0	1	27	0	0	0	1	0
PENK	proenkephalin			Opioid	0	0	0	0	0	23	5	1
PGF1	placental growth factor 1	y		Pdgf/vegf growth factor	0	0	0	0	0	0	28	1
PGF2	placental growth factor 2	y		Pdgf/vegf growth factor	0	4	23	1	0	0	1	0
PMCH1	pro-melanin concentrating hormone 1	y		Melanin-concentrating hormone	3	0	0	0	1	1	23	1
PMCH2	pro-melanin concentrating hormone 2	y		Melanin-concentrating hormone	0	1	0	26	0	0	2	0
PNOC1	prepronociceptin 1	y		Opioid	0	1	0	4	0	0	23	1
PNOC2	Prepronociceptin 2	y		Opioid	0	0	0	0	1	1	25	2
POMC1A	proopiomelanocortin1A	y		Opioid	0	0	0	0	0	1	27	1
POMC1B	proopiomelanocortin 1B	y		Opioid	0	0	0	0	0	0	26	3
POMC2_v1	Proopiomelanocortin 2 isoform 1	y	v1	Opioid	0	0	0	0	0	0	25	4
POMC2_v2	Proopiomelanocortin 2 isoform 2		v2	Opioid	0	1	0	0	0	25	2	1
PRLH1	prolactin releasing hormone 1	y		Prolactin-releasing	0	0	21	1	0	0	5	2
PRLH2	prolactin releasing hormone 2	y		Prolactin-releasing	1	25	0	0	0	0	2	1
PROK1	prokineticin 1	y		avit prokineticin	25	0	0	0	0	0	2	2
PROK2	prokineticin 2	y		avit prokineticin	18	1	0	4	0	0	2	4
PTH1A	parathyroid hormone 1A	y		Parathyroid	0	0	1	13	5	0	6	4
PTH1B	parathyroid hormone 1B	y		Parathyroid	0	0	1	0	0	0	25	3
PTH2_v1	parathyroid hormone 2 isoform 1	y	v1	Parathyroid	1	20	2	0	0	1	2	3
PTH2_v2	parathyroid hormone 2 isoform 2		v2	Parathyroid	0	0	1	0	0	22	3	3
PTHLH1	parathyroid hormone like hormone 1	y		Parathyroid	0	0	0	4	0	0	24	1
PTHLH2	parathyroid hormone like hormone 2	y		Parathyroid	0	0	20	0	0	0	8	1
PTHLH3	parathyroid hormone like hormone 3	y		Parathyroid	1	26	0	0	0	0	2	0
PYY1	peptide YY1	y		NPY	27	0	0	0	0	0	1	1
PYY2	peptide YY2	y		NPY	0	0	0	0	0	1	25	3
QRFP	pyroglutamylated RFamide peptide			rfamide neuropeptide	0	1	2	0	1	23	2	0
RLN1	relaxin 1			Relaxin	0	0	0	25	1	1	2	0
RLN3A	relaxin 3A	y		Relaxin	1	27	0	0	0	0	0	1
RLN3B	relaxin 3B	y		Relaxin	0	0	2	17	1	4	5	0
SCG2A	secretogranin II A	y		granin	0	0	0	1	21	2	5	0
SCG2B	secretogranin II B	y		granin	0	0	26	1	0	0	2	0
SCG3	secretogranin III			granin	19	0	2	0	0	0	7	1
SPX1	spexin hormone 1	y		Spexin	1	13	0	0	0	1	12	2
SPX2	spexin hormone 2	y		Spexin	0	2	2	1	21	0	3	0
SST1	somatostatin 1	y		Somatostatin/Urotensin	27	0	0	0	0	0	1	1
SST2	somatostatin 2	y		Somatostatin/Urotensin	1	2	24	0	1	1	0	0
SST3	somatostatin 3	y		Somatostatin/Urotensin	0	0	0	1	0	0	27	1
SST5	somatostatin 4	y		Somatostatin/Urotensin	0	1	0	0	0	0	21	7
SST6	somatostatin 5	y		Somatostatin/Urotensin	2	0	0	1	0	1	25	0
TAC1A_v1	tachykinin precursor 1A isoform 1	y	v1	tachykinin	23	0	0	0	0	0	0	6
TAC1A_v2	tachykinin precursor 1A isoform 2		v2	tachykinin	0	0	0	2	0	2	0	25
TAC1B	tachykinin precursor 1B	y		tachykinin	0	27	0	1	0	0	0	1
TAC3A	tachykinin 3A	y		tachykinin	0	0	0	2	0	0	22	5
TAC3B	tachykinin 3A	y		tachykinin	0	0	1	0	0	0	28	0
TAC4A	tachykinin 4A	y		tachykinin	20	1	0	0	0	0	7	1
TAC4B	tachykinin 4A	y		tachykinin	0	0	4	22	0	0	3	0
TOR2A	torsin family 2 member A			clpa clpb family torsin subfamily	0	0	28	0	0	0	1	0
TRH	thyrotropin releasing hormone			trh	23	1	3	0	0	0	1	1
UCN2	urocortin 2			Corticotrophin	0	1	2	2	1	1	22	0
UCN3	urocortin 3			Corticotrophin	0	0	6	19	0	0	3	1
URP1	rotensin II-related peptide 1	y		Somatostatin/Urotensin	0	0	5	0	0	0	23	1
URP2	rotensin II-related peptide 2	y		Somatostatin/Urotensin	0	24	1	0	0	0	1	3
UTS1	Urotensin 1	y		Corticotrophin	20	0	1	0	0	1	5	2
UTS2A	urotensin 2B			Somatostatin/Urotensin	1	0	26	1	0	0	0	1
UTS2B	urotensin 2A			Somatostatin/Urotensin	0	0	1	0	0	2	26	0
VEGFA1	vascular endothelial growth factor A1	y		Pdgf/vegf growth factor	25	1	0	0	0	0	3	0
VEGFA2_v1	vascular endothelial growth factor A2 isoform 1	y	v1	Pdgf/vegf growth factor	0	0	20	1	0	0	5	3
VEGFA2_v2	vascular endothelial growth factor A2 isoform 2		v2	Pdgf/vegf growth factor	0	21	2	1	0	1	4	0
VEGFC1	vascular endothelial growth factor C1	y		Pdgf/vegf growth factor	0	0	25	0	2	0	2	0
VEGFC2	vascular endothelial growth factor C2	y		Pdgf/vegf growth factor	0	19	2	1	3	1	3	0
VEGFD	vascular Endothelial Growth Factor D			Pdgf/vegf growth factor	1	0	0	25	1	0	0	2
VGF1	VGF nerve growth factor inducible 1	y		granin	0	0	0	1	0	1	27	0
VGF2	VGF nerve growth factor inducible 2	y		granin	0	0	0	0	0	0	29	0
VIP	vasoactive intestinal peptide			Glucagon	27	0	1	0	0	0	0	1
VSTM2A	V-set and transmembrane domain containing 2A			Immunoglobulin V-set	0	3	23	1	1	0	1	0
