# Supplementary material for: Characterization of the prohormone complement in Amphiprion and related fish species integrating genome and transcriptome assemblies
Source: PLoS One. 2020 Mar 12;15(3):e0228562. doi: 10.1371/journal.pone.0228562 (PMC7067429; doi:10.1371/journal.pone.0228562)
Supplement: S2 File — CART prepropeptide (CARTPT) protein sequences used to generate the phylogenetic tree in Fig 2. (FASTA) [file pone.0228562.s002.fasta]

>CARTPT1A|Amphiprion_bicinctus
MASSRMLLLVASCWLLVVVGSCETAKEERSIEYDGIETQEEKELIEALQEVLEKLKNKQLPSSEKKLGWLPACDAGEQCAVRKASRIGKLCGCPRGTICNFNVLKCL
>CARTPT1A|Amphiprion_melanopus
MASSRMLLLVASCWLLVVVGSCETAKEERSIENDGIETQEEKELIEALQEVLEKLKNKQLPSSEKKLGWLPACDAGEQCAVRKASRIGKLCGCPRGTICNFNVLKCL
>CARTPT1A|Amphiprion_ocellaris
MVSSRMLLLVASCWLLVVVGSCETAKEERSIEYDGIETQEEKELIEALQEVLEKLKNKQLPSSEKKLGWLPACDAGEQCAVRKASRIGKLCGCPRGTVCNFNVLKCL
>CARTPT1A|Amphiprion_percula
MVSSRMLLLVASCWLLVVVGSCETAKEERSIEYDGIETQEEKELIEALQEVLEKLKNKQLPSSEKKLGWLPACDAGEQCAVRKASRIGKLCGCPRGTVCNFNVLKCL
>CARTPT1A|Amphiprion_sebae
MASSRMLLLVASCWLLVVVGSCETAKEERSIEYDGIETQEEKELIEALQEVLEKLKNEQLPSSEKKLGWLPACDAGEQCAVRKASRIGKLCGCPRGTICNFNVLKCL
>CARTPT1A|Acanthochromis_polyacanthus
MVSSRMLLLIASCWLLVVVGSCENAKEERSIEYDGIETQEEKELIEALQEVLEKLKNKQLPSSEKKLGWLPACDAGEQCAVRKASRIGKLCGCPRGTVCDFNVLKCV
>CARTPT1A|Amphiprion_akallopisos
MASSRMLLLVASCWLLVVVGSCETAKEERSIEYDGIETQEEKELIEALQEVLEKLKNKQLPSSEKKLGWLPACDAGEQCAVRKASRIGKLCGCPRGTICNFSVLKCL
>CARTPT1A|Amphiprion_clarkii
LLLVASCWLLVVVGSCETAKDERSIEYDGIETQEEKELIEALQEVLEKLKNKQLPSSEKKLGWLPACDAGEQCAVRKASRIGKLCGCPRGTICNFNVLKCL
>CARTPT1A|Amphiprion_frenatus
MASSRMLLLVASCWLLVVVGSCETAKEERSIENDGIETQEEKELIEALQEVLEKLKNKQLPSSEKKLGWLPACDAGEQCAVRKASRIGKLCGCPRGTICNFNVLKCL
>CARTPT1A|Amphiprion_nigripes
MASSRMLLLVASCWLLVVVGSCETAKEERSIEYDGIETQEEKELIEALQEVLEKLKNKQLPSSEKKLGWLPACDAGEQCAVRKASRIGKLCGCPRGTICNFNVLKCL
>CARTPT1A|Amphiprion_perideraion
MASSRMLLLVASCWLLVVVGSCETAKEERSIEYDGIETQEEKELIEALQEVLEKLKNKQLPSSEKKLGWLPACDAGEQCAVRKASRIGKLCGCPRGTICNFSVLKCL
>CARTPT1A|Amphiprion_polymnus
MASSRMLLLVASCWLLVVVGSCETAKEERSIEYDGIETQEEKELIEALQEVLEKLKNKQLPSSEKKLGWLPACDAGEQCAVRKASRIGKLCGCPRGTICNFNVLKCL
>CARTPT1A|Astatotilapia_burtoni
MVSSRMLLLGASCWLLVVLGSCEEPIEERSAEYDAIETQEEKELIEALQEVLEKLKGKQLPSSEKKLGWLAACDAGEQCAIRKASRIGKLCGCPGGTACNFSVLKCL
>CARTPT1A|Chromis_chromis
MVGSRMLLLGASCWLLVVVGSCEEAKEERSLEYDGIETQEEKELIEALQEVLEKLKNKQLPSSEKKLGWLPACDAGEQCAVRKASRIGKLCGCPTGTVCNFNVLKCL
>CARTPT1A|Chromis_viridis
MVSSRMLLLSASCWLLVVVGSCEEAKEERSLQLDGIETQEEKELIEALQEVLEKLKNKQLPSSEKKLGWLPACDAGEQCALRKASRIGKLCGCPRGTVCNFNVLKCL
>CARTPT1A|Lates_calcarifer
MVSGRMLLLSASCWLLVVVGSCEELIEERSPEDDAIKTQEEKELIEALQEVLEKLKSKQLPSSEKKLGWLPSCDAGEQCAVRKGSRIGKLCGCPRGTVCNFSVLKCL
>CARTPT1A|Nothobranchius_furzeri
MVPRRMLLLSASCWLLVALGSCDELIEERSLEFEVIKTEDEKELIEALQEVLEKLRNKQLPSSEKKLGRLPPCDAGEQCAVREGSRIGSLCGCPRGTVCNFSVLQCV
>CARTPT1A|Pomacentrus_moluccensis
MVSSRMLLLVASCWLLVVVGSCETAKEERSIEYDGIETQEEKELIEALQEVLEKLKNKQLPSSEKKLGWLPACDAGEQCAVRKASRIGKLCGCPRGTVCNFNVLKCL
>CARTPT1A|Premnas_biaculeatus
MVSSRMLLLVASCWLLVVVGSCEKEKEERSIEYDGIETQEEKELIEALQEVLEKLKNKQLPSSEKKLGWLPACDAGEQCAVRKASRIGKLCGCPRGTVCNFNVLKCL
>CARTPT1A|Pseudochromis_fuscus
PQCDLGEHCAVRKGSRIGKMCDCPRGAFCNFFLLKCL
>CARTPT1A|Stegastes_partitus
MVRSRMLLLGASCWLVVVVGSCEAVKEERSLEFDGIETQEEKELIEALQEVLEKLKNKQLPSSEKKLGWLPACDAGEQCAVRKASRIGKLCGCPRGTICDFSVLKCL
>CARTPT1B|Amphiprion_bicinctus
MVSARTLLLAVTCCCAYLWLVRAEDSSLETRSLDFPLKNQQEKDLIDALQEVLEKLRSKEMPLEKKLGWLPSCDAGEPCAVRKGARIGTLCSCPRGTSCNFYVLKCL
>CARTPT1B|Amphiprion_melanopus
MVSARTLLLAVTCCCAYLWLVRAEDSSLETRSLDFPLKNQQEKDLIDALQEVLEKLRSKEMPLEKKLGWLPSCDAGEPCAVRKGARIGTLCSCPRGTSCNFYVLKCL
>CARTPT1B|Amphiprion_ocellaris
MVSARTLLAVTCCCAYLWLVRAEDSSLETRSLDFPLKNQQEKDLIDALQEVLEKLRSKEMPLEKKLGWLPSCDAGEPCAVRKGARIGTLCSCPRGTSCNFYVLKCL
>CARTPT1B|Amphiprion_percula
MVSARTLLAVTCCCAYLWLVRAEDSSLETRSLDFPLKNQQEKDLIDALQEVLEKLRSKEMPLEKKLGWLPSCDAGEPCAVRKGARIGTLCSCPRGTSCNFYVLKCL
>CARTPT1B|Amphiprion_sebae
MVSARTLLLAVTCCCAYLWLVRAEDSSLETRSLDFPLKNQQEKDLIDALQEVLEKLRSKEMPLEKKLGWLPSCDAGEPCAVRKGARIGTLCSCPRGTSCNFYVLKCL
>CARTPT1B|Acanthochromis_polyacanthus
MVSARTLLLAVTCCCAYLWLVRAEDSSLEMRSLDFPLKNQQEKDLIDALQEVLEKLRSKEMPLEKKLGWLPSCDAGEPCAVRKGARIGTLCSCPRGTSCNFYVLKCL
>CARTPT1B|Amphiprion_akallopisos
MVSARTLLLAVTCCCAYLWLVRAEDSSLETRSLDFPLKNQQEKDLIDALQEVLEKLRSKEMPLEKKLGWLPSCDAGEPCAVRKGARIGTLCSCPRGTSCNFYVLKCL
>CARTPT1B|Amphiprion_clarkii
MVSARTLLLAVTCCCAYLWLVRAEDSSLETRSLDFPLKNQQEKDLIDALQEVLEKLRSKEMPLEKKLGWLPSCDAGEPCAVRKGARIGTLCSCPRGTSCNFYVLKCL
>CARTPT1B|Amphiprion_frenatus
MVSARTLLLAVTCCCAYLWLVRAEDSSLETRSLDFPLKNQQEKDLIDALQEVLEKLRSKEMPLEKKLGWLPSCDAGEPCAVRKGARIGTLCSCPRGTSCNFYVLKCL
>CARTPT1B|Amphiprion_nigripes
MVSARTLLLAVTCCCAYLWLVRAEDSSLETRSLDFPLKNQQEKDLIDALQEVLEKLRSKEMPLEKKLGWLPSCDAGEPCAVRKGARIGTLCSCPRGTSCNFYVLKCL
>CARTPT1B|Amphiprion_perideraion
MVSARTLLLAVTCCCAYLWLVRAEDSSLETRSLDFPLKNQQEKDLIDALQEVLEKLRSKEMPLEKKLGWLPSCDAGEPCAVRKGARIGTLCSCPRGTSCNFYVLKCL
>CARTPT1B|Amphiprion_polymnus
MVSARTLLLAVTCCCAYLWLVRAEDSSLETRSLDFPLKNQQEKDLIDALQEVLEKLRSKEMPLEKKLGWLPSCDAGEPCAVRKGARIGTLCSCPRGTSCNFYVLKCL
>CARTPT1B|Astatotilapia_burtoni
MVSVRTLLLAVTCCYAYLYLVRAEDSSLETRSLDFTLKTQQEKDLIDALQEVLEKLRSKEMPLEKKHGWLPSCDAGEPCAVRKGARIGTLCSCPRGTTCNFYVLKCL
>CARTPT1B|Chromis_chromis
MVSARTLLLAVTCGCAYLWLVHAEDSSLETRSLDFPLKNQQEKDLIDALQEVLEKLRSKEMPLEKKLGWLPSCDAGEPCAVRKGARIGTLCSCPRGTSCNFYVLKCL
>CARTPT1B|Chromis_viridis
MVSARTLLLAVTCGCAYLWLVRAEDSSLETRSLDFPLKNQQEKDLIDALQEVLEKLRSKEMPLEKKLGWLPSCDAGEPCAVRKGARIGTLCSCPRGTSCNFYVLKCL
>CARTPT1B|Larimichthys_crocea
MVSARALLLTATCCCAYLWLARAEDSSLETRSLDFPLKTQQEKDLIDALQEVLEKLRSKEMPLEKKLGWLPSCDAGEPCAVRKGARIGTLCSCPRGTSCNFYVLKCL
>CARTPT1B|Lates_calcarifer
MVSARALLFAATCCCAYLQLARAEDSSLETRSLDFPLKTQQEKDLIDALQEVLEKLRSKEMPLEKKLGWLPSCDAGEPCAVRKGARIGTLCSCPRGTSCNFYVLKCL
>CARTPT1B|Nothobranchius_furzeri
MVSLRTLLLIVTCCCAYLWCARADEDSSLETRSLDFALKTQQEKDLIDALQEVLEKLRNKDMPLEKKLGWLPSCDAGEPCAVRKGARIGTLCSCPRGTACNFYVLKCL
>CARTPT1B|Pomacentrus_moluccensis
MVSARTLLLAVTCCCAYLWLVRAEDSSLETRSLDFPLKNQQEKDLIDALQEVLEKLRSKEMPLEKKLGWLPSCDAGEPCAVRKGARIGTLCSCPRGTSCNFYVLKCL
>CARTPT1B|Premnas_biaculeatus
MVSARTLLLAVTCCCAYLWLVRAEDSSLETRSLDFPLKNQQEKDLIDALQEVLEKLRSKEMPLEKKLGWLPSCDAGEPCAVRKGARIGTLCSCPRGTSCNFYVLKCL
>CARTPT1B|Pseudochromis_fuscus
MVSARTLLLAVTCCYAYLWLARAEESSLETRSLDFPLKTQQEKELIDALQEVLEKLRSKEMPLEKKLGWLPSCDAGEPCAVRKGARIGTLCSCPRGTSCNFYVLKCL
>CARTPT1B|Stegastes_partitus
MVSARTLLLAVTCCCASLWLVRAEDSSLETRSLDFPLKNQQEKDLIDALQEVLEKLRSKEMPLEKKLGWLPSCDAGEPCAVRKGARIGTLCSCPRGTSCNFYVLKCL
>CARTPT2A|Amphiprion_bicinctus
MWARAVLCAALLSALCPEGRTEAERDEREVQDHRYNSNRLLGALHEVLERLQTKRINPWEKKYGQVPSCDLGEHCAVRKGARIGKMCDCPRGAFCNFFLLKCL
>CARTPT2A|Amphiprion_melanopus
MWARAVLCAALLSALCPEGRTEAERDEREVQDHRYNSNRLLGALHEVLERLQTNRINPWEKKYGQVPSCDLGEHCAVRKGSRIGKMCDCPRGAFCNFFLLKCL
>CARTPT2A|Amphiprion_ocellaris
MWARAVLCAALLSALCPEGRTEAERDEREVQDHRYNSNRLLGALHEVLERLQTKRINPWEKKYGQVPSCDLGEHCAVRKGSRIGKMCDCPRGAFCNFFLLKCL
>CARTPT2A|Amphiprion_percula
MWARAVLCAALLSALCPEGRTEAERDEREVQDHRYNSNRLLGALHEVLERLQTKRINPWEKKYGQVPSCDLGEHCAVRKGSRIGKMCDCPRGAFCNFFLLKCL
>CARTPT2A|Amphiprion_sebae
MWARAVLCAALLSALCPEGRTEAERDERDVQDHRYNSNRLLGALHEVLERLQTKRINPWEKKYGQVPSCDLGEHCAVRKGSRIGKMCDCPQGAFCNFFLLKCL
>CARTPT2A|Acanthochromis_polyacanthus
MWARAVLCAALLSALCPEGRTEAERDEREVQDHRYNSNRLLGALHEVLERLQTKRINPWEKKYGQVPSCDLGEHCAVRKGSRIGKMCDCPRGAFCNFFLLKCL
>CARTPT2A|Amphiprion_akallopisos
MWARAVLCAALLSALCPEGRTEAERDEREVQDHRYNSNRLLGALHEVLERLQTNRINPWEKKYGQVPSCDLGEHCAVRKGSRIGKMCDCPRGAFCNFFLLKCL
>CARTPT2A|Amphiprion_clarkii
MWARAVLCAALLSALCPEGKTEAERDEREVQDHRYNSNRLLGALHEVLERLQTNRINPWEKKYGQVPSCDLGEHCAVRKGSRIGKMCDCPRGAFCNFFLLKCL
>CARTPT2A|Amphiprion_frenatus
MWARAVLCAALLSALCPEGRTEAERDEREVQDHRYNSNRLLGALHEVLERLQTNRINPWEKKYGQVPSCDLGEHCAVRKGSRIGKMCDCPRGAFCNFFLLKCL
>CARTPT2A|Amphiprion_nigripes
MWARAVLCAALLSALCPEGRTEAERDEREVQDHRYNSNRLLGALHEVLERLQTKRINPWEKKYGQVPSCDLGEHCAVRKGSRIGKMCDCPQGAFCNFFLLKCL
>CARTPT2A|Amphiprion_perideraion
MWARAVLCAALLSALCPEGRTEAERDEREVQDHRYNSNRLLGALHEVLERLQTNRINPWEKKYGQVPSCDLGEHCAVRKGSRIGKMCDCPRGAFCNFFLLKCL
>CARTPT2A|Amphiprion_polymnus
MWARAVLCAALLSALCPEGRTEAERDERDVQDHRYNSNRLLGALHEVLERLQTKRINPWEKKYGQVPSCDLGEHCAVRKGSRIGKMCDCPQGAFCNFFLLKCL
>CARTPT2A|Astatotilapia_burtoni
MWARAVLCAVLLSALCPAGKTEAERDEREVQDYHNSNRLLGALHEVLERLQTKRINPWEKKYGQVPSCDLGEYCAIRKGSRIGKMCDCPRGAFCNFFLLKCL
>CARTPT2A|Chromis_chromis
MWARAVLCAALLSALCPAGRTEAERDEREVQDYRYNSNRLLGALHEVLERLQTKRINPWEKKYGQVPSCDLGEHCAVRKGSRIGKMCDCPRGAICNFILLKCL
>CARTPT2A|Chromis_viridis
MWARAVLCAALLSAMCPTGRTEAERDEREVQDYRYNSNRLLGALHEVLERLQTKRINPWEKKYGQVPSCDLGEHCAVRKGSRIGKMCDCPRGAICNFVLLKCL
>CARTPT2A|Larimichthys_crocea
MWARAVLCGALLCALCPAGRTEAERDERGVQDHRYNSNRLLGALHEVLEKLQTKRINPWEKKYGQVPSCDLGEHCAVRKGSRIGKMCDCPPGAFCNSFLLKCL
>CARTPT2A|Lates_calcarifer
MWARAVLCAALLSALCPAGRTEAERDEREVQDYRYNSNRLLGALHEVLEKLQTKRINPWEKKYGQVPSCDLGEHCAVRKGSRIGKMCDCPRGAFCNFFLLKCL
>CARTPT2A|Nothobranchius_furzeri
MWARGVLCAALLCALSPARATEAVRDDREVQDSRYNSNRLLGALHEVLERLQTKRTNPWEKKFGQVPSCDLGEHCAIRKGSRIGKMCDCPQGAFCNFFLLKCL
>CARTPT2A|Pomacentrus_moluccensis
MWARAVLCAALLSALCPEGRTEAERDEREVQDHRYNSNRLLGALHEVLERLQTKRINPWEKKYGQVPSCDLGEHCAIRKGSRIGKMCDCPQGAFCNFFLLKCL
>CARTPT2A|Premnas_biaculeatus
MWARAVLCAALLSALCPEGRTEAERDEREVQDYRYNSNRLLGALHEVLERLQTKRINPWEKKYGQVPSCDLGEHCAVRKGSRIGKMCDCPKGALCNFFLLNCL
>CARTPT2A|Pseudochromis_fuscus
MWARAVLCCALFCALCPAGRTEAERHARDMQDFSYSSNRLLGDLHQVLEKLQTKRINPWEKKYGQVPSCDLGEHCAVRKGSRIGKMCDCPRGAFCNFFLLKCL
>CARTPT2A|Stegastes_partitus
MWARAVLCAALLSALCPAGRTEAERDEREVQDYRYNSNRLLGALHEVLERLQTKRINPWEKKYGQVPSCDLGEHCAVRKGSRIGKMCDCPRGALCNFFLLKCL
>CARTPT2B|Amphiprion_bicinctus
MHSSRLISGALLCALLLLSSVAGAEMLDSESEQELSPRALRDFYPKGPNLTSEKQLLGALQEVLEKLQAKRLPLWEKKFGQVPTCDVGEQCAVRKGARIGKMCDCPRGAFCNFFLLKCL
>CARTPT2B|Amphiprion_melanopus
MHSSRLISGALLCALLLLSSVAGAEMLDSESEEELSPRALRDFYPKGPNLTSEKQLLGALQEVLEKLQAKRLPLWEKKFGQVPTCDVGEQCAVRKGARIGKMCDCPRGAFCNFFLLKCL
>CARTPT2B|Amphiprion_ocellaris
MHSSRLISGVLLCALLLLSSVAGAEMLDSESEEELSPRALRDFYPKGPNLTSEKQLLGALQEVLEKLQAKRLPLWEKKFGQVPTCDVGEQCAVRKGARIGKMCDCPRGAFCNFFLLKCL
>CARTPT2B|Amphiprion_percula
MHSSSLISGALLCALLLLSSVAGAEMLDSESEEELSPRALRDFYPKGPNLTSEKQLLGALQEVLEKLQAKRLPLWEKKFGQVPTCDVGEQCAVRKGARIGKMCDCPRGAFCNFFLLKCL
>CARTPT2B|Amphiprion_sebae
MHSSRLISGALLCALLLLSSVAGAEMLDSESEEELSPRALRDFYPKGPNLTSEKQLLGALQEVLEKLQAKRLPLWEKKFGQVPTCDVGEQCAVRKGARIGKMCDCPRGAFCNFFLLKCL
>CARTPT2B|Acanthochromis_polyacanthus
MHSSRLISGALLCALLLLSSAAGAEMLDSESEEELSPRALRDFYPKGPNLTSEKQLLGALQEVLEKLQAKRLPLWEKKFGQVPTCDVGEQCAVRKGARIGKMCDCPRGAFCNFFLLKCL
>CARTPT2B|Amphiprion_akallopisos
MHSSRLISGALLCALLLLSSVAGAEMVDSESEEELSPRALRDFYPKGPNLTSEKQLLGALQEVLEKLQAKRLPLWEKKFGQVPTCDVGEQCAVRKGARIGKMCDCPRGAFCNFFLLKCL
>CARTPT2B|Amphiprion_clarkii
MHSSRLISGALLCALLLLSSVAGAEMLDSESEEELSPRALRDFYPKGPNLTSEKQLLGALQEVLEKLQAKRLPLWEKKFGQVPTCDVGEQCAVRKGARIGKMCDCPRGAFCNFFLLKCL
>CARTPT2B|Amphiprion_frenatus
MHSSRLISGALLCALLLLSSVAGAEMLDSESEEELSPRALRDFYPKGPNLTSEKQLLGALQEVLEKLQAKRLPLWEKKFGQVPTCDVGEQCAVRKGARIGKMCDCPRGAFCNFFLLKCL
>CARTPT2B|Amphiprion_nigripes
MHSSRLISGALLCALLLLSSVAGAEMLDSESEEELSPRALRDFYPKGPNLTSEKQLLGALQEVLEKLQAKRLPLWEKKFGQVPTCDVGEQCAVRKGARIGKMCDCPRGAFCNFFLLKCL
>CARTPT2B|Amphiprion_perideraion
MHSSRLISGALLCALLLLSSVAGAEMVDSESEEELSPRALRDFYPKGPNLTSEKQLLGALQEVLEKLQAKRLPLWEKKFGQVPTCDVGEQCAVRKGARIGKMCDCPRGAFCNFFLLKCL
>CARTPT2B|Amphiprion_polymnus
MHSSRLISGALLCALLLLSSVAGAEMLDSESEEELSPRALRDFYPKGPNLTSEKQLLGALQEVLEKLQAKRLPLWEKKFGQVPTCDVGEQCAVRKGARIGKMCDCPRGAFCNFFLLKCL
>CARTPT2B|Astatotilapia_burtoni
MQSSRLLSGALLCALLLLSSAAGAEVLDSESEEELSPRALRDFYPKGPNLTSEKQLLGALQEVLEKLQAKRLPLWEKKFGQVPTCDIGEQCAVRKGARIGKMCDCPRGAFCNFFLLKCL
>CARTPT2B|Chromis_chromis
MQSSRLLSGALLCALLLLSSAAGSEMLDSESEEELSPRALRDFYPKGPNLTSEKQLLGALQEVLEKLQAKRLPLWEKKFGQVPTCDVGEQCAVRKGARIGKMCDCPRGAFCNFFLLKCL
>CARTPT2B|Chromis_viridis
MQSSRLLSGALLCALLLSSAAGSEMLDSESEEELSPRALRDFYPKGPNLTSEKQLLGALQEVLEKLQAKRLPLWEKKFGQVPTCDVGEQCAVRKGARIGKMCDCPRGAFCNFFLLKCL
>CARTPT2B|Larimichthys_crocea
MQSSRLLSGALLCALLLLSGVAGAQVLDTESEEELSPRALRDFYPKGPNLTSEKQLLGALQEVLEKLQAKRLPLWEKKFGQVPTCDVGEQCAVRKGARIGKMCDCPRGAFCNFFLLKCL
>CARTPT2B|Lates_calcarifer
MQSSRLLSGALLCALLLLSSAAGAEVLDTESEEELSPRALRDFYPKGPNLTSEKQLLGALQEVLEKLQAKRLPLWEKKFGQVPTCDVGEQCAVRKGARIGKMCDCPRGAFCNFFLLKCL
>CARTPT2B|Nothobranchius_furzeri
MQSSRLPSGALLCALLLLSAGAAGAQLMDTESEEELSPRALRDFYPKGPNLTSEKQLLGALQEVLEKLQANRLPAWEKKFGQVPTCDVGEQCAVRKGARIGKMCDCPRGAFCNFFLLKCL
>CARTPT2B|Pomacentrus_moluccensis
MHSSRLISGALLCALLLLSSVAGAEMLDSESEEELSPRALRDFYPKGPNLTSEKQLLGALQEVLEKLQAKRLPLWEKKFGQVPTCDVGEQCAVRKGARIGKMCDCPRGAFCNFFLLKCL
>CARTPT2B|Premnas_biaculeatus
MHSSRLISGALLCALLLLSSVAGAEMLDSESEEELSPRALRDFYPKGPNLTSEKQLLGALQEVLEKLQAKRLPLWEKKFGQVPTCDVGEQCAVRKGARIGKMCDCPRGAFCNFFLLKCL
>CARTPT2B|Pseudochromis_fuscus
MHNSRLLSGALLCALLLLSSAADAEVLDPESEEVLSPRALRDFYPKGPNLTSEKQLLGALHEVLEKLQAKRLPLWEKKFGQVPTCDVGEQCAIRKGARIGKMCDCPRGAFCNFFLLKCL
>CARTPT2B|Stegastes_partitus
MQSSRLLSGALLCALLLLSSAAGAEMLDSESEEELSPRALRDFYPKGPNLTSEKQLLGALQEVLEKLQAKRLPLWEKKFGQVPTCDVGEQCAVRKGARIGKMCDCPRGAFCNFFLLKCL
>CARTPT3A|Amphiprion_bicinctus
MESVRAVVYLSVCLSVLTSLCQGQRSADSQLPSAPDEPILGLTTNELAEALQGLLDEADSRVGLSVEKKASVIPRCDVGERCAMKHGPRIGRLCDCLRGTACNTFFLRCY
>CARTPT3A|Amphiprion_melanopus
MESVRAVVYLSVCLSVLTSLCQGQRSADSQLPSAPDEPILGLTTNELAEALQGLLDEADSRVGLSVEKKACDVGERCAMKHGPRIGRLCDCLRGTACNTFFLRCY
>CARTPT3A|Amphiprion_ocellaris
MESVRAVVYLSVCLSVLTSLCQGQRSADSQLPSVPDEPILGLTTNELAEALQGLLDEADSRVGLSVEKKASVIPRCDVGERCAMKHGPRIGRLCDCLRGTACNTFFLRCY
>CARTPT3A|Amphiprion_percula
MESVRTIVYLSVCLSVLTSLCQGQRSADSQLPSVPDEPILGLTTNELAEALQGLLDEADSRVGLSVEKKASVIPRCDVGERCAMKHGPRIGRLCDCLRGTACNTFFLRCY
>CARTPT3A|Amphiprion_sebae
MESVRAVVYLSVCLSVLTSLCQGQRSADSQLPSAPDEPILGLTTNELAEALQGLLDEADSRVGLSVEKKASVIPRCDVGERCAMKHGPRIGRLCDCLRGTACNTFFLRCY
>CARTPT3A|Acanthochromis_polyacanthus
MESVRAVVYLSVCLSVLTSLCQGQRSADSQLPLTPDEPILGLTTNELAEALQGLLDEADNRVGLSVEKKASVIPRCDVGERCAMKHGPRIGRLCDCLRGTACNTFFLRCY
>CARTPT3A|Amphiprion_akallopisos
MESVRAVVYLSVCLSVLTSLCQGQRSADSQLPSAPDECDVGERCAMKHGPRIGRLCDCLRGTACNTFFLRCY
>CARTPT3A|Amphiprion_clarkii
MESVRAVVYLSVCLSVLTSLCQGQRSADSQLPSAPDEPILGLTTNELAEALQGLLDEADSRVGLSVEKKASVIPRCDVGERCAMKHGPRIGRLCDCLRGTACNTFFLRCY
>CARTPT3A|Amphiprion_frenatus
MESVRAIVYLSVCLSVLTSLCQGQRSADSQLPSAPDECDVGERCAMKHGPRIGRLCDCLRGTACNTFFLRCY
>CARTPT3A|Amphiprion_nigripes
MESVRAVVYLSVCLSVLTSLCQGQRSADSQLPSAPDECDVGERCAMKHGPRIGRLCDCLRGTACNTFFLRCY
>CARTPT3A|Amphiprion_perideraion
MESVRAVVYLSVCLSVLTSLCQGQRSADSQLPSAPDECDVGERCAMKHGPRIGRLCDCLRGTACNTFFLRCY
>CARTPT3A|Amphiprion_polymnus
MESVRAVVYLSVCLSVLTSLCQGQRSADSQLPSAPDECDVGERCAMKHGPRIGRLCDCLRGTACNTFFLRCY
>CARTPT3A|Astatotilapia_burtoni
MESKRAVVYLSVCLSVLTSLCQGQRSGNSHLLSAPDDPTLGLTTSELAEALQGLLDEADSSAGLSVEKKASVIPRCDVGERCAMKHGPRIGRLCDCLRGTACNTFFLRCY
>CARTPT3A|Chromis_chromis
MESVRAVVYLSVCLSVLTSLCQGQRSADSQMPSAPDEPILGLTTNELAEALQGLLDEADSRVGLSVEKKASVIPRCDVGERCAMKHGPRIGRLCDCLRGTACNTFFLRCY
>CARTPT3A|Chromis_viridis
MESVRAVVYLSVCLSVLTSLCQGQRSPDSQVPSAPDEPILGLTTNELAEALQGLLDEADSRVGLSVEKKASVIPRCDVGERCAMKHGPRIGRLCDCLRGTACNTFFLRCY
>CARTPT3A|Larimichthys_crocea
MESVRAAVYLSVCLSVLTSLCQGQRSPDEPSIGLTTKELAEALQGLLDEADSSVGLSVEKKASVIPRCDVGERCAMKHGPRIGRLCDCLRGTACNTFFLRCY
>CARTPT3A|Lates_calcarifer
MESVRAVVYLSVCLSVLTSLCQGQRSVDNQPPSAPDEPLLRLTTRELAEALQGLLDEADSSLGLSVEKKASVIPRCDVGERCAMKHGPRIGRLCDCLRGTACNTFFLRCY
>CARTPT3A|Nothobranchius_furzeri
MESLRAVVYLSVFLSLMTSVCQGERSSENQLQSVSDEPVFGLATNELAEALQGLLNEADARVGLSVEKKASVIPRCDVGERCAMKHGPRIGRLCDCLRGTACNTFFLRCY
>CARTPT3A|Pomacentrus_moluccensis
MESVRAVVYLSICLSVLTSLCQGQRSADSQLPSASDECDVGERCAMKHGPRIGRLCDCLRGTACNTFFLRCY
>CARTPT3A|Premnas_biaculeatus
MESVRAVVYLSVCLSVLTSLCQGQRSADSQLPSAPDECDVGERCAMKHGPRIGRLCDCLRGTACNTFFLRCY
>CARTPT3A|Pseudochromis_fuscus
AEALQDLLDEADHRVGLSVEKKASVIPRCDVGERCAMKHGPRIGRLCDCLRGTACNTFFLRCY
>CARTPT3A|Stegastes_partitus
MESVRAVVYLSVCLSVLTSLCQGQRSADSQLPSAPDESILGLTTNELAEALQGLLDEADSRVALSVEKKASVIPRCDVGERCAMKHGPRIGRLCDCLRGTACNTFFLRCY
>CARTPT3B|Amphiprion_bicinctus
MESSGSLLGLLLLLLGLLSVLCHDQVSQEVSEEFGEDKPEAAADRDLLEALEALLGRTQNRVPSTEKRGSIPLCGMGDRCAMKFGPRIGKLCDCGRAANCNSYLLKCI
>CARTPT3B|Amphiprion_melanopus
MESSGSLLGLLLLLLGLLSVLCHDQVSQEVSEEFGEDKPEAAADRDLLEALEALLGRTQNRVPSTEKRGSIPLCGMGDRCAMKFGPRIGKLCDCGRAANCNSYLLKCI
>CARTPT3B|Amphiprion_ocellaris
MESSGSLLGLLLLLLGLLSVLCHGQVSQEVSEKFGEDKPEAAADRDLLEALEALLGRTQNRVPSTEKRGSIPLCGMGDRCAMKFGPRIGKLCDCGRAANCNSYLLKCI
>CARTPT3B|Amphiprion_percula
MESSGSLLGLLLLLLGLLSVLCHGQVSQEVSEEFGEDKPEAAADRDLLEALEALLGRTQNRVPSTEKRGSIPLCGMGDRCAMKFGPRIGKLCDCGRAANCNSYLLKCI
>CARTPT3B|Amphiprion_sebae
MESSGSLLGLLLLLLGLLSVLCHDQVSQEVSEEFGEDKPEAAADRDLLEALEALLGRTQNRVPSTEKRGSIPLCGMGDRCAMKFGPRIGKLCDCGRAANCNSYLLKCI
>CARTPT3B|Acanthochromis_polyacanthus
MESSGSLLGLLLLLLLGLLSVLCHGQVSLEVSDEFGEGKPEAAADRDLLEALEALLGRTQNRVPSTEKRGSIPLCGMGDHCAMKFGPRIGKLCDCGRAANCNSYLLKCI
>CARTPT3B|Amphiprion_akallopisos
MESSGSLLGLLLLLLGLLSVLCHDQVSQEVSEEFGEDKPEAAADRDLLEALEALLGRTQNRVPSTEKRGSIPLCGMGDRCAMKFGPRIGKLCDCGRAANCNSYLLKCI
>CARTPT3B|Amphiprion_clarkii
MESSGSLLGLLLLLLGLLSVLCHDQVSQEVSEEFGEDKPEVAADRDLLEALEALLGRTQNRVPSTEKRGSIPLCGMGDRCAMKFGPRIGKLCDCGRAANCNSYLLKCI
>CARTPT3B|Amphiprion_frenatus
MESSGSLLGLLLLLLGLLSVLCHDQVSQEVSEEFGEDKPEAAADRDLLEALEALLGRTQNRVPSTEKRGSIPLCGMGDRCAMKFGPRIGKLCDCGRAANCNSYLLKCI
>CARTPT3B|Amphiprion_nigripes
MESSGSLLGLLLLLLGLLSVLCHVQVSQEVSEEFGEDKPEAAADRDLLEALEALLGRTQNRVPSTEKRGSIPLCGMGDRCAMKFGPRIGKLCDCGRAANCNSYLLKCI
>CARTPT3B|Amphiprion_perideraion
MESSGSLLGLLLLLLGLLSVLCHDQVSQEVSEEFGEDKPEAAADRDLLEALEALLGRTQNRVPSTEKRGSIPLCGMGDRCAMKFGPRIGKLCDCGRAANCNSYLLKCI
>CARTPT3B|Amphiprion_polymnus
MESSGSLLGLLLLLLGLLSVLCHDQVSQEVSEEFGEDKPEAAADRDLLEALEALLGRTQNRVPSTEKRGSIPLCGMGDRCAMKFGPRIGKLCDCGRAANCNSYLLKCI
>CARTPT3B|Astatotilapia_burtoni
MDSSGMLRGLLLVGLLSVLCHGQASREVSAEDFGEKKQEAAVDRDLLEALDVLLGRNHNQVSPEKRGSIPLCGLGNRCAMKYGPRIGKLCDCGRGANCNSYLLKCI
>CARTPT3B|Chromis_chromis
MESSGTLRGLLLLLGLLSALSHGQVSQEASEEFGEDKPESAADRDLLEALEALLGRMQKVPSAEKRGSIPLCGMGDRCAMKFGPRIGKLCDCGRAANCNSYLLKCI
>CARTPT3B|Chromis_viridis
MESSGTLRGLLLLLGLLSALSHGQVSQEASEEFGEDKPESAADRELVEALEALLGRMQKVPSTEKRGSIPLCGMGDRCAMKFGPRIGKLCDCGRAANCNSYLLKCI
>CARTPT3B|Larimichthys_crocea
MDSSGMLRGLLLVGLLSVMCHGQASQEVSAEDFGVDKTEPAADRDLIEALEALLGRMHGRISSPEKRGSIPLCGMGDRCAMKFGPRIGKLCDCGRGANCNSYLLKCI
>CARTPT3B|Lates_calcarifer
MDNSGMLRGLLFVGLLSILCHGQASQEVSAEDFGVEKAEPAADRDLIEALEALLGRMHNRISSTEKRGSIPLCGMGDRCAMKFGPRIGKLCDCGRGANCNSYLLKCI
>CARTPT3B|Nothobranchius_furzeri
MESSRLLHRLLLVGLLSILCHGQATREVSAENSEMDKPAPAADRDLVMEALEVLLGQTRDRTSSNEKRGSIPVCGMGDRCAMKFGPRIGKLCDCRRGASCNSYLLKCI
>CARTPT3B|Pomacentrus_moluccensis
MESSGSLLGLLLLLFGLLSVLCHGQVSQEVSEEFGEDKPEAAADRDLLEALEALLGRTQNRVPSTEKRGSIPLCGMGYRCAMKFGPRIGKLCDCGRAANCNSYLLKCI
>CARTPT3B|Premnas_biaculeatus
MESSGSLLGLLLLLLGLLSVLCHGQVSQEVSEEFGEDKPEAAADRDLLEALEVLLGRTQNRVPSTEKRGSIPLCGMGDRCAMKFGPRIGKLCDCGRAANCNSYLLKCI
>CARTPT3B|Pseudochromis_fuscus
IEALEVLLGRMHSRVSSPEKRGSIPLCGMGDRCAMKFGPRIGKLCDCGRGANCNSYLLKCI
>CARTPT3B|Stegastes_partitus
MESSGTLRGLLLLLGLLSAVCHGQVSQEVSEEFGEDKAEAAADRDLIEALEALLGRAQNRLPSTEKRGSIPLCGMGDRCAMKFGPRIGKLCDCGRGANCNSYLLKCI
>CARTPT4|Amphiprion_bicinctus
MGNWCVYLFCSLLYATGLFYSYGQIQTEEHKRKYLTYFTTADDSNEKQLINDLHEVLERLQNNQFPALRKKHGFLPVCDPGDQCALRKGSRIGKLCDCSLPRTCNSFLHRCL
>CARTPT4|Amphiprion_melanopus
MGNWCVYLFCSLLYATGLFYSYGQIQTEEHKRKYLTYFTTTDDSNEKQLINDLHEVLERLQNNQFPALRKKHGFLPVCDPGDQCALRKGSRIGKLCDCSLPRTCNSFLHRCL
>CARTPT4|Amphiprion_ocellaris
MGNWCLYLFCSLLYATGLFYSYGQIQTEEHKRKYLTYFTTTDDSNEKQLVSDLHEVLERLQNNQFPALRKKHGFLPVCDPGDQCALRKGSRIGKLCDCSLPRTCNSFLHRCL
>CARTPT4|Amphiprion_percula
MGNWCVYLFCSLLYATGLFYSYGQIQTEEHKRKYLTYFTTTDDSNEKQLINDLHEVLERLQNNQFPALRKKHGFLPVCDPGDQCALRKGSRIGKLCDCSLPRTCNSFLHRCL
>CARTPT4|Amphiprion_sebae
MGNWCVYLFCSLLYATGLFYSDGQIQTEEHKRKYLTYFTTTDDSNEKQLINDLHEVLERLQNNQFPALRKKHGFLPVCDPGDQCALRKGSRIGKLCDCSLPRTCNSFLHRCL
>CARTPT4|Acanthochromis_polyacanthus
MGNWCVYLFCSLLYATGLFYSYGQIQTEEHKRKYLTFFTTTEDSNEKQLINDLHEVLERLQNNQFPALRKKHGFLPVCDPGDQCALRKGSRIGKLCDCSLPRTCNSFLHRCL
>CARTPT4|Amphiprion_akallopisos
MGNWCVYLFCSLLYATGLFYSYGQIQTEEHKRKYLTYFATTDDSNEKQLINDLHEVLERLQNNQFPALRKKHGFLPVCDPGDQCALRKGSRIGKLCDCSLPRTCNSFLHRCL
>CARTPT4|Amphiprion_clarkii
MGNWCVYLFCSLLYATGLFYSYGQIQTEEHKRKYLTYFTTTDDSNEKQLINDLHEVLERLQNNQFPALRKKHGFLPVCDPGYQCALRKRSRIGELCDCSRPRTCNSFLHRCL
>CARTPT4|Amphiprion_frenatus
MGNWCVYLFCSLLYATGLFYSYGQIQTEEHKRKYLTYFTTTDDSNEKQLINDLHEVLERLQNNQFPALRKKHGFLPVCDPGDQCALRKGSRIGKLCDCSLPRTCNSFLHRCL
>CARTPT4|Amphiprion_nigripes
MGNWCVYLFCSLLYATGLFYSYGQIQTEEHKRKYLTYFTTTDDSNEKQLINDLHEVLERLQNNQFPALRKKHGFLPVCDPGDQCALRKGSRIGKLCDCSLPRTCNSFLHRCL
>CARTPT4|Amphiprion_perideraion
MGNWCVYLFCSLLYATGLFYSYGQIQTEEHKRKYLTYFTTTDDSNEKQLINDLHEVLERLQNNQFPALRKKHGFLPVCDPGDQCALRKGSRIGKLCDCSLPRTCNSFLHRCL
>CARTPT4|Amphiprion_polymnus
MGNWCVYLFCSLLYATGLFYSDGQIQTEEHKRKYLTYFTTTDDSNEKQLINDLHEVLERLQNNQFPALRKKHGFLPVCDPGDQCALRKGSRIGKLCDCSLPRTCNSFLHRCL
>CARTPT4|Astatotilapia_burtoni
MGGSCACLFCTILCATGLLYGCGHVQAEEYETKYFTYFTTKEDGNEKQLISDLHDVLERLQNHPFPVLRKKHGYLPVCDPGEQCALRKGSRIGKLCDCSLPRTCNSFLHRCL
>CARTPT4|Chromis_chromis
MGNWCVYLFCSLLYATGLFYSYGQIQTEEHKRKYLTYFSTREDGNEKQLINDLYEVLERLQNNQFPALRKKQGFLPVCDPGDQCALRKGSRIGKLCDCSLPRTCNSFLHRCL
>CARTPT4|Larimichthys_crocea
MGSWCVCLFCTLLCATGRFYSRAHSQTEEYKTKHLPYFTTTEDGNEKQLISDLHEVLERLQNNQFPALRKKHGYLPVCDPGDLCALRKGSRIGKLCDCSLPRTCNSFLHRCL
>CARTPT4|Lates_calcarifer
MGNWCVYLFCTLLCATGLFYSYGHIQTEEFKTRHLPYFSTTEDSNEKQLINDLHEVLERLQNNHFPALRKKHGHLPVCDPGEQCALRKGSRIGKLCDCSLPRTCNSFLHRCL
>CARTPT4|Nothobranchius_furzeri
MRGWCAFLFFSQLWTPGLFYSHAQTQKEEHQTKHTTFFAATEHSNEKQLINDLHQVLERLQNNKFPVLRKKHGYLPACDPGEQCALRIGSRIGKLCDCSLPRTCNSFLHRCL
>CARTPT4|Pomacentrus_moluccensis
MGNWCVYLFCSLLYATGLFYSYGQIQTEEHKRKYLTYFTTTDDSNEKQLINDLHEVLERLQNNQFPALRKKHGFLPVCDPGDQCALRKGSRIGKLCDCSLPRTCNSFLHRCL
>CARTPT4|Premnas_biaculeatus
MGNWCVYLFCSLLYATGLFYSYGQIQTEEHKRKYLTYFTTTEDGNEKQLINDLHEVLERLQNNQFPALRKKHGFLPVCDPGDQCALRKGSRIGKLCDCSLPRTCNSFLHRCL
>CARTPT4|Pseudochromis_fuscus
MGSWCVYLFCTLLCTTGLFYSYGHIQTEEYNRKYSTYFTATQDSNEKQLINDLHEVLERLQNNQFPALRKKHGYLPVCDPGDQCALRKGSRIGKLCDCSLPRTCNSFLHRCL
>CARTPT4|Stegastes_partitus
MGNWCVYLFCSLLYATGFFCSYGQIETEEYKRKYLPYFTTTEDGNEKQLVSDLHEVLERLQNYPFPALRKKHGFLPVCDPGDQCALRKGSRIGKLCDCSLPRTCNSFLHRCL
>CARTPT5|Amphiprion_bicinctus
MNLYLLFLLLTCCISLDRVGGRLPDFTPATPQQVAEFNVVRLPGLCRRLKRRRVTVLCNLDKFCWGRSRGRSQKSGQVCRCPRGSRCSHFFVHSL
>CARTPT5|Amphiprion_melanopus
MNLYLLFLLLTCCISLDRVGGRLPDFTPATPQQVAEFNVVRLPGLCRRLKRRRVTVLCNLDKFCWGRSRGRSQKSGQVCRCPRGSRCSHFFVHSL
>CARTPT5|Amphiprion_ocellaris
MNLYLLFLLLTCCISLDRVGGRLPDFTPATPQQVAEFNVVRLPGLCRRLKRRRVTVLCNLDKFCWGRSRGRSQKSGQVCQLPRGSRCSHFFVQSL
>CARTPT5|Amphiprion_percula
MNLYLLFLLLTCCISLDRVGGRLPDFTPATPQQVAEFNVVRLPGLCRRLKRRRVTVLCNLDKFCWGRSRGRSQKSGQVCRCPRGSRCSHFFVHSL
>CARTPT5|Amphiprion_sebae
MNLYLLFLLLTCCISLDRVGGRLPDFTPATPQQVAEFNVVRLPGLCQRLKRRRVTVLCNLDKFCWGRSRGRSQKSGQVCRCPRGSRCSHFFVHSL
>CARTPT5|Acanthochromis_polyacanthus
MNLYLLFLLLICSVSLHRVGGHLPDFTPATPQQVADFNVVRLPGLCRRLKRRRVTVLCNLDKFCWGRSRGRSQKSGQVCRCPRGSRCSHFFVHSL
>CARTPT5|Amphiprion_akallopisos
MNLYLLFLLLTCCISLDRVGGRLPDFSPATPQQVAEFNVVRLPGLCRRLKRRRVTVLCNLDKFCWGRSRGRSQKSGQVCRCPRGSRCSHFFVHSL
>CARTPT5|Amphiprion_nigripes
MNLYLLFLLLTCCISLDRVGGHLPDFTPATPQQVAEFNVVRLPGLCRRLKRRRVTVLCNLDKFCWGRSRGRSQKSGQVCRCPRGSRCSHFFVHSL
>CARTPT5|Amphiprion_perideraion
MNLYLLFLLLTCCISLDRVSGRLPDFTPATPQQVAEFNVVRLPGLCRRLKRRRVTVLCNLDKFCWGRSRGRSQKSGQVCRCPRGSRCSHFFVHSL
>CARTPT5|Amphiprion_polymnus
MNLYLLFLLLTCCISLDRVGGRLPDFTPATPQQVAEFNVVRLPGLCRRLKRRRVTVLCNLDKFCWGRSRGRSQKSGQVCRCPRGSRCSHFFVHSL
>CARTPT5|Astatotilapia_burtoni
MKLSEFSVFLLLVCISLQRADSHLPNFSPGTPPLQENIFRRLPGLCRRLKRRRVTVLCNLEKFCWGRSQTSHSGQLCQCPRGSRCSHFFLHSL
>CARTPT5|Chromis_chromis
MNLYVVFLLLSCCVSLVGGRLPDFTPATPQQVSDLNVVRLPGLCRRLKRRRVTVLCHLDKFCWGRSRGRSQKSGQVCRCPRGSRCSHFFVHSL
>CARTPT5|Chromis_viridis
MNLYLLFLLLSCCVSLLGVGGRLPDFTPATPQQGSELNVVRLPGLCRRLKRRRVTVLCHLEKFCWGRSRGRSQRSGQVCRCPRGSRCSHFFVHSL
>CARTPT5|Larimichthys_crocea
MRMNVCVLLVLLVCLQRVTCSLPHLTPATPTLQVRQVDVSMDSGAIPSVFRRLPGLCRRLKRRRVTVLCNLEKFCWSGRSQQLQSGQVCWCPRGSRCSQFFVHSL
>CARTPT5|Lates_calcarifer
MRLNVFLLLICCICLRRVDLSLPDFTPVTPPLQVGQVKASVTRIDFTRLPGLCQRLKRRRVTVLCQLEKFCWWGRGRGRSQGRGQKNQSGQVCRCPRGSRCSHFFVHSL
>CARTPT5|Nothobranchius_furzeri
MKLGVCAVLLLLISSLPKVDCSLPDFTPATAQLQKNDFIRLPGICKRLKRRRITILCNMDKFCRGHTWWRNQKLPPGQMCRCPRGSRCSHFFLHSL
>CARTPT5|Pomacentrus_moluccensis
MNLYLLFLLLTCCISLDRVGGRLPDFTPATPQQVAEFNVVRLPGLCRRLKRRRVTVLCNLDKFCWGRSQGRSQKSGQVCRCPRGSRCSHFFVHSL
>CARTPT5|Premnas_biaculeatus
MNLYLLFLLLTCCMSLHRVSGRLPDFTPATPQQVAEFNVVRLPGLCRRLKRRRVTVLCNLDKFCWGRSRGRSQKSGQVCRCPRGSRCSHFFVHSL
>CARTPT5|Pseudochromis_fuscus
VEVSQLNAVTPQRRNHARRLPGLCRRLKRRRVTVLCNLDKFCWERSRGQSHKTQSGQVCQCPWGSRCSHFFVHSL
>CARTPT5|Stegastes_partitus
MKLCVVFLLLTCCIRLHRVGCRLPDLTPATPLQVSKSNTVTTLKRNVVRLPGLCRRLKRRRVTVLCNLDVFCWGRSRGRSQKSGQVCRCPRGSRCSHFFVHSL
>CARTPT8|Lates_calcarifer
CEVGASCLVKKGPRFGRLCDCPRPSTCNFFFLRCL
>CARTPT1|Eptatretus_burgeri
LEALQQVLEKLQNKRVPTWQKKFGQTPMCSFGGRCALRRGPRIGKLCDCPQGTSCSSYLLKCL

>CARTPT2|Rhincodon_typus
MESDRLFAAIYLSILLSLASGSDSSDLETRALRDFYPKDPYPSSEKELLGALQEVLEKLQTKRLPAWEKKFGQVPLCDVGEQCAVRKGARIGKLCDCPRSSGCNFFLLKCL
>CARTPT1|Rhincodon_typus
MESTRLCLLTLLSAALLVNSNCQDSELQARSIDRYSVKEDSSQEKELIEALQEVLEKLKSKRMPTYEKKFGMVPMCDAGEQCAVRKGARIGRLCDCPRGTFCNSFLLKCL
>CARTPT1|Callorhinchus_milii
MESSRLCLLTLLSAALLLHSHCQESDLESRSLDHSSAKEDSSQEKELIEALQEVLEKLKSKRMPTYEKKFGMVPMCDAGEQCAVRKGARIGKLCDCPRGTFCNSFLLKCL
>CARTPT3|Callorhinchus_milii
MESCNMLGLLLCVSVLLLLCQGQSSGELSSAEDYPAKTPNASTEKELFEAVEEILGKLHNAISPSYEKKAGQIPKCDIGDRCAIKQGPRIGKLCDCARGTTCNSFLLKCI
>CARTPT2|Callorhinchus_milii
MDSSRLLLLTCVCSLLSLTCGAEVSELESRSLRNFYPKDSSLSSEKELLGALQEVLEKLQSKRLPTWEKKFGQLPLCDIGEQCAVRKGARIGKLCDCPRSTGCNFFLLKCL


>CARTPT2B|Latimeria_chalumnae
MDSSKLLLIAVICTVLLSTVFGSESSELETRALGDFYSKDPNLYNEKELVRALQEVLEKLQSKRVPTWEKKFGQVPMCDVGEQCAVRKGARIGKLCDCPRGSICNFFLLKCL
>CARTPT1B|Latimeria_chalumnae
MEVSRLCLFTLLAAVVICSSEYQERRELEPRSLDLYSTKEDSSEKELIEALQEVLEKLKSKRIPVYEKKYNQVPMCDAGEQCALRKGSRIGKLCDCPRGTSCNSFLLKCL
>CARTPT1A|Latimeria_chalumnae
MVSSRLSLLYFSCSMLLLLVCCEESLEIRSSESNLNKSQEEKELIEALQEVLEKLKNKRVPSAEKKLGWVPSCDAGEQCAVRKGARIGKLCNCPRGTSCNFYILKCL
>CARTPT3B|Latimeria_chalumnae
MESSSFFLQLLCASLLLLLCGGQSSREISAEDFPVKKSPSSAERELVEAMEELLGKFQNRYPTYEKKGGQIPLCAIGERCAVKQGPRIGKLCDCSRGSSCNSFLLKCI


>CARTPT4|Solea_senegalensis
MGSCCVYVFCTLLCAAGLTRIQTEEYKHLPYFTTTGNGNEQQLISDLHEVLEKLQYNQYPSLRKKHGYLPLCDPGDLCALRKGSRIGKLCDCPLPRTCNSFLHRCL
>CARTPT2A|Solea_senegalensis
MWARAVVCAALLSVICPSGSTEAERDVQDTRSNTNTNRLLGALHEVLEKLQTNRIHLWEKKYGQVPSCDLGEHCAVRKGSRIGKMCDCPRGASCHFLLLKCL
>CARTPT1A|Solea_senegalensis
MVKMLLLSASCWLLVVTGCCEDDVFKTQEEKELIEALQEVLEKLKSKQLPSTEKKLGWLPSCDVGQQCALRKGSRIGKLCSCPGGNVCNFDVLKCV
>CARTPT2B|Solea_senegalensis
MQSSRLLSGALLCALLLLSSAFGVEVMDTESEEELSPRALRDFYPKGPNLTSEKQLLGALQEVLEKLQTKRLPLWEKKFGQVPTCDVGEQCAVRKGARIGKMCDCPRGAFCNFFLLKCL
>CARTPT1B|Solea_senegalensis
MVSARTLLLAVTCCCAYLWLVRAEDSSLETRSLDFSLKSQQEKDLIDALQEVLEKLRSKEMPLEKKLGWLPSCDAGEPCAVRKGARIGTLCSCPRGTACNFYVLKCL
>CARTPT3A|Solea_senegalensis
MEKVRTMVFLSVCLSVMTSLCQGQRSPYNNQLDETNLGLTTRELVEALQGVLGDSDTLSLSVEKKASVIPRCDVGERCAMKHGPRIGRLCDCLRGTACNTFFLRCY
>CARTPT3B|Solea_senegalensis
MDSSGMLRGLLFVGLLSALCHGQASQEVSAEDFTVEKPEPAADKDLLEALEALLGRMHNRISSTEKRGSIPLCGMGERCAMKYGPRIGKLCDCGRAANCNSYLLKCI

>CARTPT1A|Danio_rerio
MVGERIFLLTVTCSVLMLLVCCDEVLQIRSPEEDKAQEEKELIEALQEVLEKLRNKQIPAVEKKLGWVPSCDAGEQCAVRKGSRFGKLCSCPGGTACSFSILKCL
>CARTPT1B|Danio_rerio
MFSRRIVFFAAASALSFILTHCDDSLEDRSLDTAAKRQDENNLIEALQEVLEKLKNKQLPQTGKKLSLLPSCDAGEQCAIRKGARVGKLCSCPQGTSCHFFILKCL
>CARTPT2C|Danio_rerio
MESSSLRMRMAVCALLVCLLTGARANESEPEIEVELDTRAIRDFYPKDPNLNSEKQLLGALQEVLEKLQTKRIPPWEKKFGQVPMCDLGEQCAIRKGSRIGKMCDCPRGALCNFFLLKCL
>CARTPT2B|Danio_rerio
MESSKIWSTAMVCAVLLSCIQAAEMDFDNESDLETRALREFYPKDPNLTNEKQLLGALHDVLEKLQSKRISLWEKKFGRVPTCDVGEQCAIRKGSRIGKMCDCPRGAFCNYFLLKCL
>CARTPT3A|Danio_rerio
MESVRAAVYLSVFLSLLSVCRAQIQMQDSRLSEQDEQFIKRDLAEALDELLDGEQDNRISLEKKASVIPRCDVGERCAMKHGPRIGRLCDCMRGTACNTFFLRCY
>CARTPT3B|Danio_rerio
MTSSEMLMTGLLVAGLFTVLCSGQTSQELTFDDAQLSPQETENQLVEAMTALLERYQSHLPSSEKRAIPQCALGSRCAMRLGSRFGKLCECGRGSNCNSFLLKCI
>CARTPT5|Danio_rerio
MSNLSILVVVLHCAVYIYFKTSGVESRPPDYQPTGLFIDDPTEATRDVANFKDNLQRQVVPILKKKFNRLPGVCRRLKRRRITILCNTEKFCSAMKYSQHGHICSCPKRSKCSHFFLWTL

>CARTPT|Homo_sapiens
MESSRVRLLPLLGAALLLMLPLLGTRAQEDAELQPRALDIYSAVDDASHEKELIEALQEVLKKLKSKRVPIYEKKYGQVPMCDAGEQCAVRKGARIGKLCDCPRGTSCNSFLLKCL
>CARTPT|Gallus_gallus
MESCRGLALCAVAAALLLSARGQGPPPPRRDRDLGPPGGGGASREKELIEALQEVLEKLKSKRVPHYEKKFGQVPMCDAGEQCAVRKGARIGKLCDCPRGTSCNSFLLKCL
>CARTPT|Python_bivittatus
MESSRLFALLGAALLLLVGAHGQEEGELQPRALDLYSTMEDTSHEKELIEALQEVLEKLKSKRLPHYEKKYGQVPMCDAGEQCAVRKGARIGKLCDCPRGTSCNTFLLKCL
>CARTPT|Ambystoma_mexicanum
ARGSAPRLPLLLLLSSALLLLGAVGQEPGDLEPRALDFYSSLENASHEKELIEALQEVLEKLKSKRLPTYEKKYGQVPMCDAGEQCAIRKGARIGKLCDCPRATSCNSFLLKCL

>CARTPT1A|Xenopus_tropicalis
MASHRLHLVCLSLSLLLFLVYSDESVGVRSAEPADSSQEEKELIDALQEVLEKLKSKRILPLDKKLGWVPSCDAGEQCAVRKGARIGKLCNCPRGTACNFYILKCL
>CARTPT1A|Xenopus_laevis NP_001087565.1
MVSHRLPLVCLSLSLLLFLVYSEETVGVRSAEPADSSQEEKELIDALQEVLEKLKSKRILPLDKKLGWVPSCDAGEQCAVRKGARIGKLCNCPRGTACNFYILKCL


>CARTPT1B|Xenopus_tropicalis
MESARLHLLLWPLLLLLSLSANCQEDSDSLETRAADFFSQGDNSVHEKDLIDALQEVLEKLKNKRLPLFEKKYGQVPMCDAGEQCAVRKGPRIGKLCDCPRRTSCNTFLLKCL
>CARTPT1B|Xenopus_laevis XP_018082327.1
MESSRLHLMLGPLFLLLFLSANCQEDADSLETRAADFFSQGDNSVHEKDLIDALQEVLEKLKNKRLPLFEKKYGQVPMCDAGEQCAVRKGPRIGKLCDCPRRTSCNTFLLKCL

>CARTPT2B|Xenopus_tropicalis
MDSSRLRLIALGCTLLLIAAVSGQEDSAELETRALRDFYPKDASPSSEKELLGALQEVLEKLQNKRIPSWEKKFGQVPVCDVGEQCAVRKASRIGKLCNCPRGAVCNFFLLKCL
>CARTPT2B|Xenopus_laevis XP_018107213.1
MDSSRLRLLAFGCTLLLIAAVSGQEDSAELETRALRDFYPKDANPSNEKELLGALQEVLEKLQNKRIPSWEKKFGQVPVCDVGEQCAVRKASRIGKLCNCPRGAICNFFLLKCL
>CARTPT2A|Xenopus_laevis XP_018110162.1
MDSSRLRLLALGCALLLIAAVSGQEDSAELETRALRDFYPKDASPSSEKEVLGALQEVLEKLQNKRIHSWEKKFGQVPVCDVGEQCAVRKASRIGKLCNCPPGAVCNFFLLKCLQ

>CARTPT3B|Xenopus_tropicalis
MDSKIVLFKLLCASLLIACLCNAQSSREMSSEDFDGNKSPSSSEKELVEAMEELLGKFQDRYPTYQKKAQIPLCDIGERCAVKQGPRIGKLCDCSRGSSCNSFLLKCI
>CARTPT3B|Xenopus_laevis XP_018110860.1
MDSKIVLFKLLCASLLIACLCNAQSSREVSEEDFDGNKSPSSSERELVEAMEELLGKFQDRHPTYQKKAQIPLCDIGERCAVKQGPRIGKLCDCSRGSSCNSFLLKCI
>CARTPT3A|Xenopus_laevis XP_018108635.1
MDSKIVLFKLLCASLLIACLCNAQSSREISAEEFDGNKSPSSSERELVEAMEELLGKFQDRYPSYQKKAQIPLCDIGERCAVKQGPRIGKLCDCTRGSSCNSFLLKCI
