# Supplementary material for: Characterization of the prohormone complement in Amphiprion and related fish species integrating genome and transcriptome assemblies
Source: PLoS One. 2020 Mar 12;15(3):e0228562. doi: 10.1371/journal.pone.0228562 (PMC7067429; doi:10.1371/journal.pone.0228562)
Supplement: S2 Table — (XLSX) [file pone.0228562.s005.xlsx]

## Sheet: S3_Table
ph	Name	Duplicated	isoform version	Family	MeaPED_Full	MeaPED_Pomacentridae	MeaPED_Amphiprion		mean_nRF_Full	mean_NE_Full		mean_nRF_Pomacentridae	mean_NE_Pomacentridae		mean_nRF_Amphiprion	mean_NE_Amphiprion
CALCA_v2	calcitonin related polypeptide alpha isoform 2		v2	calcitonin	0.00696324	6.16246e-08	4.4733e-08		0.982976	0.535552		0.975393	0.545999		0.845061	0.625614
ADCYAP1A_v2	adenylate cyclase activating polypeptide 1A isoform 2		v2	Glucagon	0.0332224	0.00120773	4.02597e-08		0.974812	0.539427		0.979549	0.544243		0.845061	0.625614
ADCYAP1A_v1	adenylate cyclase activating polypeptide 1A isoform 1	y	v1	Glucagon	0.0299274	0.00115791	0.00059521		0.977015	0.538412		0.994083	0.537467		0.845061	0.625614
ADCYAP1B_v1	adenylate cyclase activating polypeptide 1B isoform 1	y	v1	Glucagon	0.0420815	0.00481975	0.00294772		0.945865	0.553132		0.914682	0.574214		0.856037	0.620589
CALCA_v1	calcitonin related polypeptide alpha isoform 1	y	v1	calcitonin	0.00996455	0.00133167	0.000996656		0.938503	0.557893		0.994018	0.537681		0.955641	0.576495
PTHLH1	parathyroid hormone like hormone 1	y		Parathyroid	0.0540617	0.00748251	0.00341729		0.928991	0.562187		0.931319	0.568605		0.962372	0.573549
ADCYAP1B_v2	adenylate cyclase activating polypeptide 1B isoform 2		v2	Glucagon	0.0530492	0.00758002	0.00464543		0.949025	0.551631		0.959839	0.553571		0.855612	0.620796
UCN3	urocortin 3			Corticotrophin	0.0389592	0.00587549	0.00147195		0.839516	0.602191		0.922078	0.570803		0.920848	0.591925
PGF1	placental growth factor 1	y		Pdgf/vegf growth factor	0.153543	0.0236878	0.0101908		0.854039	0.597914		0.894799	0.583725		0.930272	0.587727
CARTPT1B	CART prepropeptide 1B	y		CARTPT	0.0314483	0.00510284	5.26763e-08		0.88615	0.581471		0.916125	0.573779		0.845061	0.625614
SPX1	spexin hormone 1	y		Spexin	0.0374269	0.00613598	0.00151177		0.914477	0.567993		0.908986	0.576928		0.896719	0.602673
IGF1	insulin like growth factor 1			Insulin	0.0215999	0.00373879	3.37507e-08		0.943006	0.553144		0.934195	0.565359		0.845061	0.625614
NMU_v2	neuromedin U isoform 2		v2	nmu	0.115419	0.0218771	0.0103725		0.77125	0.63923		0.869045	0.601969		0.78013	0.65889
EDN3A	endothelin 3A	y		endothelin sarafotoxin	0.222186	0.044068	0.0087739		0.752734	0.64551		0.787053	0.635149		0.890816	0.610473
SST3	somatostatin 3	y		Somatostatin/Urotensin	0.0896939	0.017812	0.00235269		0.920693	0.566373		0.98248	0.542874		0.845061	0.625614
ADM2A	adrenomedullin 2A	y		calcitonin	0.100341	0.0201865	0.00853689		0.741045	0.648863		0.788034	0.633247		0.828316	0.632866
PDGFB2	platelet derived growth factor subunit B2	y		Pdgf/vegf growth factor	0.0278683	0.00588231	0.00237921		0.681053	0.678275		0.757537	0.649309		0.788031	0.650681
CRH1A	corticotropin releasing hormone 1	y		Corticotrophin	0.0115847	0.00246561	0.00064965		0.952094	0.548915		0.940773	0.562499		0.845061	0.625614
RLN3A	relaxin 3A	y		Relaxin	0.130463	0.0289087	0.0106335		0.843734	0.601534		0.912206	0.575604		0.910055	0.596655
POMC2_v2	Proopiomelanocortin 2 isoform 2		v2	Opioid	0.096999	0.0215132	0.00588159		0.68371	0.679014		0.731735	0.6625		0.75958	0.667871
NMB1	neuromedin B1	y		bombesin neuromedin b ranatensin	0.0645846	0.0147593	0.00181873		0.755258	0.643459		0.787706	0.633234		0.779599	0.654579
PTH1A	parathyroid hormone 1A	y		Parathyroid	0.240792	0.0554332	0.0222465		0.826445	0.609342		0.909518	0.578525		0.927275	0.589008
INSL5A	insulin like 5A	y		Relaxin	0.1429	0.0331842	0.0138402		0.822803	0.61107		0.929197	0.569571		0.800539	0.649961
VGF1	VGF nerve growth factor inducible 1	y		granin	0.0377571	0.00892107	0.00254567		0.681698	0.678291		0.711019	0.668892		0.790051	0.649772
POMC1B	proopiomelanocortin 1B	y		Opioid	0.0764551	0.0182301	0.00494309		0.778595	0.63107		0.835586	0.610923		0.840434	0.627492
PGF2	placental growth factor 2	y		Pdgf/vegf growth factor	0.265633	0.0651405	0.0109847		0.735945	0.651293		0.797964	0.628437		0.839137	0.628029
TAC3B	tachykinin 3A	y		tachykinin	0.373635	0.0923699	0.0297149		0.673785	0.683424		0.732559	0.662133		0.862613	0.622803
SCG2A	secretogranin II A	y		granin	0.00940812	0.00236652	0.000688141		0.701041	0.669142		0.763367	0.644552		0.800255	0.645308
UTS2A	urotensin 2B			Somatostatin/Urotensin	0.0604074	0.0151989	0.00242068		0.863142	0.593306		0.929586	0.569059		0.860402	0.623795
INS1B	insulin 1B	y		Insulin	0.284696	0.0717699	0.0183886		0.736081	0.654208		0.786537	0.637208		0.826899	0.638428
CARTPT5	CART prepropeptide 5	y		CARTPT	0.334954	0.08449	0.0176882		0.782632	0.63391		0.860528	0.603895		0.93254	0.600581
PYY2	peptide YY2	y		NPY	0.0724905	0.0186163	0.00194746		0.906786	0.57166		0.882392	0.58951		0.845061	0.625614
CHGA	chromogranin A			granin	0.0957029	0.0247144	0.00704973		0.713104	0.663404		0.740678	0.6551		0.823639	0.634932
OSTN	osteocrin			Osteocrin	0.20596	0.0536363	0.0192754		0.762496	0.640007		0.804968	0.625533		0.826155	0.633787
SCG3	secretogranin III			granin	0.0154863	0.00406988	0.00208673		0.719491	0.660403		0.837093	0.610556		0.799086	0.645804
GCG1A	glucagon 1A	y		Glucagon	0.058945	0.0155083	0.00606848		0.91303	0.570951		0.876633	0.593771		0.890264	0.605377
IAPP	islet amyloid polypeptide			calcitonin	0.0711175	0.018712	0.00726088		0.861257	0.593211		0.793295	0.630611		0.897364	0.602236
NTS	neurotensin			neurotensin	0.0617369	0.0163032	0.00733182		0.818627	0.613406		0.753856	0.649		0.899065	0.601492
SST1	somatostatin 1	y		Somatostatin/Urotensin	0.108217	0.0293833	0.00387966		0.924065	0.564775		0.895982	0.583171		0.942283	0.582477
CCK1	Cholecystokinin 1	y		gastrin cholecystokinin	0.128271	0.0348704	0.00703239		0.827404	0.607917		0.878593	0.591098		0.94003	0.583428
NMS	neuromedin S			nmu	0.111494	0.030355	0.0115301		0.807048	0.620037		0.870903	0.59704		0.924107	0.590455
NPPB	natriuretic peptide B			Natriuretic peptide	0.250645	0.0685429	0.0128912		0.702488	0.670177		0.749719	0.654209		0.851559	0.62764
IGF2	insulin like growth factor 2			Insulin	0.019121	0.0052357	0.00079216		0.78279	0.63045		0.849125	0.604824		0.855478	0.620985
PENK	proenkephalin			Opioid	0.0794908	0.0222689	0.00584781		0.705589	0.665659		0.742285	0.654363		0.764753	0.661015
GHRL	ghrelin and obestatin prepropeptide			motilin(CHK ME)	0.200223	0.0561453	0.0121778		0.774685	0.634923		0.878946	0.592887		0.90017	0.601037
SST6	somatostatin 5	y		Somatostatin/Urotensin	0.397747	0.113943	0.0379004		0.755084	0.645313		0.865077	0.601364		0.851559	0.62764
CARTPT4	CART prepropeptide 4	y		CARTPT	0.110699	0.0318652	0.0162921		0.918997	0.568233		0.920369	0.573331		0.913903	0.594961
ADM1B	adrenomedullin 1B	y		calcitonin	0.269198	0.0776357	0.0225046		0.779999	0.633914		0.74874	0.652897		0.792708	0.648615
NMU_v5	neuromedin U isoform 4		v5	nmu	0.107754	0.0310989	0.0128559		0.722867	0.660386		0.816422	0.623428		0.840505	0.632476
NPPC3	natriuretic peptide C3	y		Natriuretic peptide	0.164907	0.0475957	0.0082749		0.78377	0.629606		0.874952	0.592755		0.927912	0.588719
ADM1A	adrenomedullin 1A	y		calcitonin	0.076694	0.0222331	0.00375019		0.78977	0.62711		0.788275	0.632974		0.933865	0.586115
NPY1	neuropeptide Y2	y		NPY	0.034721	0.0101709	0.00338256		0.863405	0.592176		0.858226	0.600567		0.779599	0.654579
NMU_v3	neuromedin U isoform 3		v3	nmu	0.120612	0.0355498	0.0115415		0.703689	0.668447		0.829351	0.615676		0.863074	0.617447
PTH1B	parathyroid hormone 1B	y		Parathyroid	0.271914	0.080572	0.0115817		0.746646	0.648404		0.758885	0.648213		0.851559	0.62764
AGRP	agouti related neuropeptide			Agouti	0.0722374	0.0215662	0.00637674		0.846767	0.601192		0.893691	0.584064		0.959219	0.574895
CARTPT3B	CART prepropeptide 3B	y		CARTPT	0.149123	0.0446385	0.00868873		0.841027	0.60283		0.896323	0.583008		0.957802	0.575574
TRH	thyrotropin releasing hormone			trh	0.0426777	0.0128002	0.0035212		0.747576	0.647078		0.76954	0.641664		0.870259	0.614264
PRLH1	prolactin releasing hormone 1	y		Prolactin-releasing	0.0411505	0.012343	0.00367555		0.8342	0.604767		0.918804	0.57255		0.928784	0.588424
EDN1B	endothelin 1B	y		endothelin sarafotoxin	0.12446	0.0374748	0.0110653		0.879201	0.584739		0.80192	0.626797		0.895685	0.60298
EDN2B	endothelin 2B	y		endothelin sarafotoxin	0.169641	0.0510866	0.0101532		0.869281	0.589435		0.922642	0.570575		0.949724	0.57917
TAC3A	tachykinin 3A	y		tachykinin	0.0939036	0.0283066	0.0114872		0.78258	0.629118		0.851069	0.603895		0.821514	0.635883
INS1A	insulin 1A	y		Insulin	0.0819222	0.0247415	0.0149941		0.85065	0.600525		0.911261	0.577713		0.833525	0.630551
NPPC1	natriuretic peptide C1	y		Natriuretic peptide	0.0821351	0.0248927	4.33566e-08		0.825968	0.611239		0.879872	0.590486		0.845061	0.625614
PDYN	prodynorphin			Opioid	0.0522092	0.0158522	0.00369882		0.764289	0.639202		0.792909	0.630982		0.881463	0.609221
NPPC2	natriuretic peptide C2	y		Natriuretic peptide	0.198062	0.0602889	0.0108011		0.774341	0.635708		0.78701	0.63353		0.894218	0.603641
URP2	rotensin II-related peptide 2	y		Somatostatin/Urotensin	0.147784	0.0450695	0.0134185		0.695029	0.671971		0.73134	0.659441		0.856037	0.620548
INS2	Insulin 2	y		Insulin	0.13096	0.0401377	0.00148019		0.841676	0.602504		0.849017	0.60487		0.898632	0.601805
QRFP	pyroglutamylated RFamide peptide			rfamide neuropeptide	0.200424	0.0615247	0.0130501		0.721048	0.65929		0.773238	0.639933		0.839052	0.628071
VEGFC1	vascular endothelial growth factor C1	y		Pdgf/vegf growth factor	0.0323376	0.00994962	0.00172523		0.818416	0.614855		0.862938	0.598558		0.930024	0.587863
NMU_v1	neuromedin U isoform 1		v1	nmu	0.118484	0.0364965	0.00923389		0.785324	0.6314		0.787867	0.634734		0.838662	0.633273
VGF2	VGF nerve growth factor inducible 2	y		granin	0.0101176	0.00311923	0.000991076		0.713093	0.662097		0.765768	0.643427		0.831611	0.631419
ADM2B	adrenomedullin 2B	y		calcitonin	0.13193	0.0408307	0.0106565		0.799046	0.622718		0.867502	0.596085		0.988924	0.561726
GNRH2	gonadotropin releasing hormone 2			gnrh	0.0668208	0.0207742	0.00252924		0.963588	0.544732		0.857471	0.60074		0.845061	0.625614
EDN1A	endothelin 1A	y		endothelin sarafotoxin	0.197228	0.0615221	0.0154067		0.813914	0.615602		0.841031	0.608348		0.869452	0.614636
SCG2B	secretogranin II B	y		granin	0.0303517	0.00957106	0.00201523		0.786962	0.628378		0.834136	0.611592		0.897938	0.602029
IGF3	insulin like growth factor 3			Insulin	0.178283	0.056231	0.0126168		0.682206	0.678833		0.741961	0.656013		0.803656	0.643778
VEGFA2_v2	vascular endothelial growth factor A2 isoform 2		v2	Pdgf/vegf growth factor	0.02656	0.00838634	0.00175276		0.937561	0.55933		0.876149	0.595884		0.978401	0.572155
VIP	vasoactive intestinal peptide			Glucagon	0.029572	0.00940146	0.00563201		0.874498	0.586885		0.877505	0.59158		0.810849	0.64069
GNRH1	gonadotropin releasing hormone 1			gnrh	0.25379	0.0809262	0.0254108		0.72926	0.655748		0.734391	0.658035		0.824596	0.634519
VEGFC2	vascular endothelial growth factor C2	y		Pdgf/vegf growth factor	0.0269547	0.00864368	0.000393413		0.714976	0.661246		0.767126	0.642813		0.789378	0.650239
CCK2	Cholecystokinin 2	y		gastrin cholecystokinin	0.0491453	0.0158628	0.00648291		0.816298	0.614496		0.858478	0.600243		0.94696	0.580328
ADM5	Adrenomedullin 5			calcitonin	0.188069	0.0610245	0.0227318		0.730603	0.653833		0.789932	0.632198		0.875361	0.611991
TAC1A_v2	tachykinin precursor 1A isoform 2		v2	tachykinin	0.115228	0.0374026	0.00627181		0.731679	0.655073		0.776759	0.641745		0.757171	0.668934
PDGFD_v2	platelet derived growth factor D isoform 2		v2	Pdgf/vegf growth factor	0.0272471	0.00902152	0.00313074		0.754774	0.644759		0.839446	0.611207		0.92928	0.594742
PTHLH2	parathyroid hormone like hormone 2	y		Parathyroid	0.0829821	0.0275073	0.00661351		0.768405	0.637187		0.83623	0.610615		0.864243	0.616951
SST5	somatostatin 4	y		Somatostatin/Urotensin	0.212077	0.0703165	0.0239978		0.834581	0.605799		0.914422	0.574157		0.882207	0.608973
GCG1B	glucagon 1B	y		Glucagon	0.0610417	0.0202836	0.00453703		0.789972	0.627033		0.826042	0.615572		0.891135	0.605047
RLN3B	relaxin 3B	y		Relaxin	0.0616994	0.0205676	0.00321402		0.853697	0.596688		0.8702	0.594969		0.802771	0.644286
RLN1	relaxin 1			Relaxin	0.166331	0.0555035	0.0210031		0.816465	0.615732		0.805734	0.625017		0.900999	0.600665
GAST	gastrin			gastrin cholecystokinin	0.230931	0.0780297	0.0372479		0.813924	0.615574		0.770332	0.641461		0.832972	0.630758
VEGFD	vascular Endothelial Growth Factor D			Pdgf/vegf growth factor	0.0307028	0.0105501	0.00207776		0.720989	0.658392		0.773502	0.639836		0.842645	0.6265
PDGFA2	platelet derived growth factor subunit A2	y		Pdgf/vegf growth factor	0.0336937	0.0116288	0.00644724		0.80381	0.619166		0.882678	0.589371		0.992312	0.56025
PDGFC	platelet derived growth factor C			Pdgf/vegf growth factor	0.0141276	0.00488093	0.00159084		0.781	0.631219		0.842502	0.607685		0.860098	0.61877
CARTPT1A	CART prepropeptide 1A	y		CARTPT	0.144928	0.0504608	0.0149091		0.73423	0.653029		0.807797	0.624021		0.820557	0.636297
PDGFD_v1	platelet derived growth factor D isoform 1		v1	Pdgf/vegf growth factor	0.0195947	0.00683213	0.00211512		0.722371	0.660543		0.861042	0.602844		0.905187	0.604184
NUCB1	nucleobindin 1	y		nucleobindin	0.0109998	0.00383614	0.00112037		0.796737	0.622428		0.872907	0.593712		0.845323	0.625342
PROK1	prokineticin 1	y		avit prokineticin	0.0499724	0.0175233	0.00493623		0.883106	0.584138		0.987017	0.540568		0.985544	0.563256
PROK2	prokineticin 2	y		avit prokineticin	0.0856839	0.0304433	0.0118562		0.842148	0.602287		0.871029	0.5948		0.932448	0.586747
NPB2	neuropeptide B2	y		neuropeptide B/W	0.105634	0.0375841	0.00960279		0.810603	0.616923		0.868456	0.595797		0.912521	0.595539
VEGFA1	vascular endothelial growth factor A1	y		Pdgf/vegf growth factor	0.0664068	0.0238492	0.0100423		0.827798	0.609053		0.833635	0.61184		0.87466	0.612363
NPFF	neuropeptide FF-amide peptide precursor			farp fmrfamide related peptide	0.0991144	0.0356372	0.00513576		0.833405	0.606439		0.853716	0.602494		0.883574	0.608489
CALCB_v1	calcitonin related polypeptide beta isoform 1	y	v1	calcitonin	0.102313	0.0369435	0.0177299		0.865354	0.591234		0.854215	0.602432		0.817581	0.637578
KISS2	KiSS-1 metastasis suppressor			kisspeptin	0.154289	0.0561706	0.0206854		0.842253	0.602217		0.879723	0.590735		0.878061	0.610834
PRLH2	prolactin releasing hormone 2	y		Prolactin-releasing	0.234449	0.0854967	0.0290074		0.872142	0.589133		0.947921	0.558791		0.959467	0.5748
CST3B	cystatin C B	y		cystatin	0.257583	0.0940409	0.0162165		0.772761	0.634712		0.813634	0.621293		0.886246	0.607155
HCRT	hypocretin neuropeptide precursor			orexin	0.216204	0.0790426	0.0283466		0.855147	0.596119		0.873228	0.593592		0.939286	0.583634
PTH2_v1	parathyroid hormone 2 isoform 1	y	v1	Parathyroid	0.151024	0.0554239	0.020719		0.767691	0.638441		0.760016	0.647679		0.845465	0.630297
PYY1	peptide YY1	y		NPY	0.061571	0.0226172	0.0142366		0.851591	0.597793		0.915942	0.573859		0.977891	0.566645
CARTPT3A	CART prepropeptide 3A	y		CARTPT	0.0581776	0.0214022	0.00843084		0.913681	0.569683		0.912852	0.575125		0.90226	0.600098
NMU_v6	neuromedin U isoform 5		v6	nmu	0.167431	0.0620662	0.0118534		0.745751	0.648534		0.824796	0.617608		0.837954	0.633592
EDN3B	endothelin 3B	y		endothelin sarafotoxin	0.135775	0.0504791	0.00681071		0.754456	0.644566		0.76442	0.644054		0.904401	0.599135
NMB2	neuromedin B2	y		bombesin neuromedin b ranatensin	0.231608	0.0864783	0.0363707		0.811042	0.616979		0.812968	0.62144		0.86318	0.617406
CHGB_v2	chromogranin B isoform 2		v2	granin	0.0436302	0.0163301	0.0028055		0.610157	0.731539		0.251984	0.90625		na	na
PMCH1	pro-melanin concentrating hormone 1	y		Melanin-concentrating hormone	0.179396	0.0673743	0.0262841		0.736496	0.652295		0.724966	0.662396		0.828848	0.632618
HAMP1	hepcidin antimicrobial peptide 1	y		hepcidin	0.217365	0.08356	0.0277697		0.861713	0.59297		0.860846	0.599332		0.940455	0.58318
APLN	apelin			apelin	0.020241	0.00782173	7.31995e-08		0.958599	0.54715		0.943546	0.561026		0.845061	0.625614
TAC1A_v1	tachykinin precursor 1A isoform 1	y	v1	tachykinin	0.136708	0.0530992	0.00417817		0.920994	0.56492		0.927144	0.568654		0.874043	0.612729
GIP	gastric inhibitory polypeptide			Glucagon	0.244081	0.0950822	0.0465613		0.778293	0.633202		0.887425	0.588774		0.839583	0.627864
PNOC1	prepronociceptin 1	y		Opioid	0.0555747	0.0216627	0.00866823		0.681305	0.678469		0.708813	0.669934		0.778465	0.654939
PDGFB1_v1	platelet derived growth factor subunit B1 isoform 1	y	v1	Pdgf/vegf growth factor	0.0475424	0.0185443	0.00318909		0.672132	0.682329		0.674811	0.687169		0.801389	0.649589
SPX2	spexin hormone 2	y		Spexin	0.298726	0.116553	0.034044		0.771474	0.635789		0.767516	0.64263		0.902771	0.59985
PNOC2	Prepronociceptin 2	y		Opioid	0.058578	0.0230746	0.00406184		0.815579	0.614863		0.853704	0.602514		0.935126	0.585589
PDGFB1_v2	platelet derived growth factor subunit B1 isoform 2		v2	Pdgf/vegf growth factor	0.0483008	0.0190581	0.00357326		0.691021	0.672573		0.728494	0.66079		0.817581	0.637619
NUCB2B	nucleobindin 2B	y		nucleobindin	0.0253032	0.0099935	0.00106453		0.79987	0.620984		0.876213	0.592166		0.856696	0.6203
EDN2A	endothelin 2A	y		endothelin sarafotoxin	0.188921	0.0751531	0.0166154		0.756891	0.642639		0.763132	0.644624		0.849965	0.623246
UTS2B	urotensin 2A			Somatostatin/Urotensin	0.116161	0.0465169	0.00547514		0.78719	0.6283		0.829118	0.61394		0.870514	0.614182
CALCB_v2	calcitonin related polypeptide beta isoform 2		v2	calcitonin	0.100675	0.0404573	0.0217175		0.815033	0.616348		0.827318	0.614913		0.822789	0.635304
PDGFA1	platelet derived growth factor subunit A1	y		Pdgf/vegf growth factor	0.0245589	0.00994797	0.00482479		0.821882	0.613184		0.85975	0.599852		0.789378	0.650239
UCN2	urocortin 2			Corticotrophin	0.0494515	0.0201211	0.00353063		0.7722	0.635436		0.831434	0.61288		0.96554	0.572102
CARTPT2B	CART prepropeptide 1B	y		CARTPT	0.0312482	0.0127524	0.00622904		0.870756	0.588733		0.859983	0.599751		0.938563	0.584089
GRP	gastrin releasing peptide			bombesin neuromedin b ranatensin	0.182565	0.074786	0.0235137		0.764446	0.64038		0.80142	0.626842		0.897938	0.602029
AVP	arginine vasopressin			vasopressin oxytocin	0.0546476	0.0227808	0.0142347		0.706507	0.665174		0.755029	0.648433		0.864349	0.61691
GHRH	growth hormone releasing hormone			Glucagon	0.0727759	0.0306241	0.0118647		0.828239	0.610169		0.89111	0.585081		0.952551	0.577806
TAC4B	tachykinin 4A	y		tachykinin	0.182862	0.0771575	0.0275847		0.728856	0.655968		0.773263	0.63994		0.876467	0.611578
NPPA	natriuretic peptide A			Natriuretic peptide	0.107148	0.0452254	0.00721758		0.731531	0.654235		0.788406	0.632872		0.837564	0.628773
CHGB_v1	chromogranin B isoform 1		v1	granin	0.0293461	0.0125373	0.00397822		0.778343	0.633298		0.770005	0.641465		0.829167	0.632494
VSTM2A	V-set and transmembrane domain containing 2A			Immunoglobulin V-set	0.0449019	0.0192338	0.00443761		0.754418	0.645145		0.772625	0.640246		0.846918	0.62464
MLN	motilin			motilin	0.165718	0.0710697	0.0267245		0.860107	0.593753		0.886422	0.587622		0.932681	0.586664
GAL_v2	galanin and GMAP prepropeptide isoform 2		v2	galanin	0.0455062	0.0195326	0.00132269		0.917158	0.566752		0.932019	0.566373		0.845061	0.625614
HAMP3A	hepcidin antimicrobial peptide 3A	y		hepcidin	0.373569	0.160644	0.0202124		0.86404	0.599538		0.900066	0.591077		0.78424	0.657083
OXT	oxytocin/neurophysin I prepropeptide			vasopressin oxytocin	0.0418467	0.0180145	0.0112661		0.783538	0.629978		0.799941	0.62749		0.834056	0.630303
INSL3	insulin like 3			Relaxin	0.504855	0.217459	0.104793		0.754561	0.645622		0.80101	0.630555		0.832851	0.635824
PTHLH3	parathyroid hormone like hormone 3	y		Parathyroid	0.246938	0.10694	0.0198275		0.735052	0.653		0.774154	0.639558		0.859566	0.619018
UTS1	Urotensin 1	y		Corticotrophin	0.0608221	0.0265463	0.00484465		0.794618	0.625609		0.835941	0.610739		0.890264	0.605419
CST3A	cystatin C A	y		cystatin	0.340097	0.148482	0.0247044		0.907267	0.572685		0.899637	0.583514		0.904549	0.599135
TOR2A	torsin family 2 member A			clpa clpb family torsin subfamily	0.0541637	0.0237409	0.00435913		0.739865	0.652049		0.758747	0.646711		0.881994	0.609097
TAC4A	tachykinin 4A	y		tachykinin	0.171836	0.0755863	0.0286813		0.872252	0.589328		0.928619	0.567912		0.848831	0.623772
POMC2_v1	Proopiomelanocortin 2 isoform 1	y	v1	Opioid	0.0580781	0.025692	0.00570598		0.731826	0.655119		0.752827	0.649427		0.791964	0.648945
NPB1	neuropeptide B1	y		neuropeptide B/W	0.0402469	0.018107	0.0117356		0.909409	0.571674		0.84655	0.605975		0.899532	0.601326
NPPC4	natriuretic peptide C4	y		Natriuretic peptide	0.0446416	0.0202236	0.00251338		0.853123	0.595743		0.881086	0.590118		0.880896	0.609688
NPY2	neuropeptide Y1	y		NPY	0.1254	0.0570162	0.0167448		0.829279	0.608354		0.911372	0.575777		0.813116	0.639645
URP1	rotensin II-related peptide 1	y		Somatostatin/Urotensin	0.109532	0.0507511	0.0082028		0.800728	0.620558		0.877517	0.591746		0.89769	0.602123
CRH1B	corticotropin releasing hormone 2	y		Corticotrophin	0.263297	0.124127	0.0243104		0.79629	0.625978		0.839055	0.610995		0.769076	0.663726
PCSK1N	proprotein convertase subtilisin/kexin type 1 inhibitor			granin	0.0597095	0.0281739	0.0108068		0.713741	0.663083		0.730792	0.659708		0.81503	0.638735
PMCH2	pro-melanin concentrating hormone 2	y		Melanin-concentrating hormone	0.194766	0.0934358	0.0359804		0.759199	0.641554		0.727792	0.661092		0.77804	0.655146
HAMP2	hepcidin antimicrobial peptide 2	y		hepcidin	0.418939	0.203848	0.0457631		0.88059	0.587835		0.959826	0.558036		0.862755	0.62275
CARTPT2A	CART prepropeptide 2A	y		CARTPT	0.0697533	0.033982	0.0158104		0.927016	0.562019		0.858335	0.600691		0.934595	0.585796
PTH2_v2	parathyroid hormone 2 isoform 2		v2	Parathyroid	0.107745	0.0532566	0.0198177		0.724387	0.658044		0.745185	0.653023		0.864881	0.616662
NPVF	neuropeptide VF precursor			farp fmrfamide related peptide	0.167666	0.0840247	0.0189188		0.698689	0.669817		0.758724	0.646704		0.834566	0.630055
GAL_v1	galanin and GMAP prepropeptide isoform 1		v1	galanin	0.0259547	0.0130467	0.00254156		0.835461	0.605216		0.873284	0.593568		0.868091	0.615375
VEGFA2_v1	vascular endothelial growth factor A2 isoform 1	y	v1	Pdgf/vegf growth factor	0.0240296	0.012179	0.00533166		0.948286	0.552024		0.955332	0.555711		0.979698	0.565819
POMC1A	proopiomelanocortin1A	y		Opioid	0.0909107	0.0477003	0.010731		0.765059	0.63963		0.786959	0.635186		0.84139	0.627037
GCG2	glucagon 2	y		Glucagon	0.445855	0.23725	0.155721		0.792042	0.624662		0.847263	0.605669		0.972293	0.569108
HAMP3B	hepcidin antimicrobial peptide 3B	y		hepcidin	0.674496	0.389407	0.100716		0.870957	0.598547		0.936358	0.57463		0.891015	0.610402
AUGN2	augurin 2	y		augurin	0.859817	0.539477	0.242364		0.8471	0.612647		0.852794	0.613271		0.829762	0.654365
GNRH3	gonadotropin releasing hormone 3			gnrh	0.0799697	0.0511324	0.0227175		0.861524	0.594421		0.819226	0.61858		0.861777	0.618026
NUCB2A	nucleobindin 2A	y		nucleobindin	0.0290395	0.019853	0.00191267		0.752188	0.64487		0.750214	0.650657		0.83108	0.631626
SST2	somatostatin 2	y		Somatostatin/Urotensin	0.0370873	0.0262045	0.0170397		0.840412	0.602849		0.879015	0.59104		0.842028	0.626831
AUGN1	augurin 1	y		augurin	0.138407	0.0984545	0.0585374		0.886689	0.58116		0.933233	0.565804		0.959056	0.574954
HAMP4B	hepcidin antimicrobial peptide 4B	y		hepcidin	0.107905	0.107905	0.0417818		0.866487	0.603072		0.857881	0.607017		0.796287	0.651821
CARTPT8	CART prepropeptide 8	y		CARTPT	na	na	na		na	na		na	na		na	na
HAMP3C	hepcidin antimicrobial peptide 3C	y		hepcidin	0.893474	na	na		na	na		na	na		na	na
HAMP4A	hepcidin antimicrobial peptide 4A	y		hepcidin	1.54886	na	na		na	na		na	na		na	na
INSL5B	insulin like 5A	y		Relaxin	0.51342	na	na		0.333333	0.916667		na	na		na	na
TAC1B	tachykinin precursor 1B	y		tachykinin	0.676904	na	na		0.629371	0.842657		na	na		na	na
